# Supplementary material for: INFERNO: a fire and emissions scheme for the Met Office's Unified Model
Source: Copernicus journal article supplement (doi:10.5194/gmd-2016-32), 2016-02-29
Supplement: Supplementary file [file gmd-2016-32-AC1-supplement.pdf]

# 1 **Response to Reviewers Comment.**

## 2 **Reviewer 1 –**

3 Mangeon et al. present the new fire and emissions scheme of the Met Office's unified model. The  
4 approach presented has a reasonable complexity for to be useful in an Earth system model. The model is  
5 evaluated using two different forcing datasets and different configurations of the ignition  
6 parameterization. Additionally the model performance is compared to the performance of fire weather  
7 indices. Overall this is an interesting presentation suitable for publication within GMD. Nevertheless I  
8 have a number of suggestions which I believe will help to strengthen and improve the manuscript.

9

10 General comments:

11

12 The comparison with GFED focusses on stating that the emissions due to peat fires cannot be reproduced  
13 by a model not including peatlands. This is correct, a solution could be to exclude the emissions from  
14 peatlands from the comparison, as GFED provides the emissions for a number of different sources.

15

16 Reply: This is a fair point highlighted by the reviewer. Nevertheless, we do mention the figures from  
17 GFED and have extended on that sentence.

18 Changes to manuscript: 1342-345. Furthermore, 2002 and 2006 also saw important peat burning, with  
19 GFEDv3 estimating peat emissions of 0.16 and 0.21 PgC respectively. In both of these years, the trend  
20 in INFERNO differs from GFEDv3's (stagnation in 2002 and decrease in 2006).

21

22 I find the term fuel density to describe the amount of fuel per m<sup>2</sup> a bit confusing, as this term is often  
23 used (for instance within spitfire) as the amount of fuel per volume. If it is the density per volume then  
24 the rate of spread decreases with increasing density. I would prefer the term fuel load.

25

26 Reply: We welcome the suggestion by the reviewer.

27 Changes in manuscript: Across the manuscript, fuel density has been replaced with fuel load, and FD  
28 with FL.

29

30 A paragraph specifying the datasets used for the model evaluation is missing.

31

32 Reply: This paragraph was added to the manuscript at the end of the model configuration section.

33 Changes in manuscript: 1272-287. Evaluation was performed against the published data for GFEDv3,  
34 FINNv1, GFAS and GFEDv4. We also used the data from GFEDv4s (<http://globalfiredata.org>,  
35 manuscript in preparation) and GFEDv4 (Giglio et al., 2013) to calculate grid-specific emissions and  
36 burnt-area. The Global Fire Emissions Database (GFED) passes satellite observation of burnt area  
37 through the Carnegie-Ames-Stanford-Approach (CASA) biogeochemical model in order to obtain

38 emissions from open burning. GFEDv4 (Giglio et al., 2013) innovates on GFEDv3 (Giglio et al., 2010)  
39 mainly through an updated algorithm to retrieve burnt area from MODIS satellite products and an  
40 increased spatial and temporal resolution, to 0.25° and daily (this resolution was assessed in Mangeon et  
41 al., 2015). Meanwhile GFEDv4s also includes the contribution from small fires (Randerson et al., 2012).  
42 The Fire Inventory from NCAR version 1.0 (FINNv1, Wiedinmyer et al., 2011) provides high-resolution  
43 (both temporal and spatial) global emissions of trace gas and particle emissions from open burning of  
44 biomass. It focuses on rapid availability and assimilation in real time forecast and follows a similar  
45 process to GFED to estimate emission, but its burnt area is obtained directly from fire pixel using land  
46 cover (Wiedinmyer et al., 2011). The Global Fire Assimilation System (GFAS, Kaiser et al., 2012),  
47 unlike the aforementioned products, directly assess emissions from satellite-observed fire radiative  
48 power more apt at detecting small fires and avoiding the uncertainty of biogeochemical models.

49

50 The evaluation could also be a bit extended, for instance showing not only results of carbon emissions  
51 but also for the different chemical species.

52

53 Reply: We have added total emissions for the different chemical species in Table 3. Still, we plan to  
54 further study specific species when performing the atmospheric composition evaluation of INFERNO,  
55 when coupled to the atmosphere. Further analysis will be included therein. Regarding the length of the  
56 evaluation, it has been increased following specific suggestions from the reviewers.

57 Changes to manuscript: 1373-381. Species-specific average emissions produced by the INFERNO  
58 scheme are shown in Table 3 in Tg per year for the 1997-2010 period. CO and CH<sub>4</sub> appear to be produced  
59 in noticeably larger quantities than in observation-based emission estimates. This hints at an  
60 overrepresentation of smouldering-type combustion. In INFERNO this might be due to the emission  
61 factors used, or the type of vegetation burnt. Table 3. Average annual emission (Tg per year) for  
62 INFERNO with the interactive ignition mode and CRUNCEP reanalysis (3 – CRUNCEP) and the  
63 constant ignition mode and WFDEI reanalysis (1 – WFDEI), comparison to GFASv1 (Kaiser et al.,  
64 2012), GFEDv3 (van der Werf et al., 2010) and FINNv1 (Wiedinmyer et al., 2011) is provided.

65

66 It remains unclear to me whether the fire model affects the vegetation dynamics, is there any tree  
67 mortality computed? also whether vegetation dynamics are included in the model simulations. If fire and  
68 vegetation dynamics interact a comparison of tree cover would be useful to evaluate that part of the  
69 model. If not, why don't they?

70

71 Reply: At this stage, we focused on providing diagnostic tools with INFERNO. Having a vegetation that  
72 interacts with fires (carbon removal and tree mortality) might be investigated in the future. This would  
73 require a much deeper investigation and calibration of vegetation within JULES, beyond the scope of  
74 our work.

75 Changes in manuscript: 1215-217. In its current early state, INFERNO provides a diagnostic tool, it does  
76 not remove carbon from vegetation nor does it lead to tree mortality. 1431-434. To close the vegetation-

77 fire feedback, INFERNO will eventually need to remove carbon from vegetation and to include tree  
78 mortality.  
79  
80 Specific comments:  
81  
82 1. 19: you could add the outcome of the fire index diagnostics comparison.  
83  
84 Reply: Thanks  
85 Changes to manuscript: 119-20. We found INFERNO captured global burnt area variability better than  
86 individual indices, and these performed best for their native regions.  
87  
88 1. 21: is this spatial or temporal correlation? Is it significant?  
89  
90 Reply: This is spatial correlation. We have modified the latter text (to keep the abstract short).  
91 Changes to manuscript: 1293-294. we found a spatial correlation of  $R=0.66$  for burnt area and  $R=0.59$   
92 for emitted carbon, both passing the t-test with 95% significance.  
93  
94 1. 101: the scaling factor is the 7.7, please specify.  
95  
96 Reply: This is now specified in the text.  
97 Changes in manuscript: 1. 102. Equation 2 includes a scaling factor of 7.7 [...]  
98  
99 1. 102-5: if you assume  $f_{NS}=1$ , you don't need it in the equation, adding this assumption after presenting  
100 the equation might be more clear: total ignitions can be represented as: eq3, here  $f_{NS}$  equals 1 for mode  
101 1 and 3 and follows eq. 2 for mode 3.  
102  
103 Reply: Thanks for the comment, we clarified it as suggested in the manuscript.  
104 Changes to the manuscript: 1103-107. Total ignitions [...] Here  $f_{NS} = 1$  for mode 1 and 2 and follows  
105 eq. 2 for mode 3.  
106  
107 1. 117: Leaf carbon is the living biomass?  
108  
109 Reply: Yes – this was clarified as aboveground to only represent living leaves  
110 Changes in the manuscript: 1119. (LeafC,PFT, aboveground)  
111  
112 1. 119: I think this should say  $FDP_{FT}$ , the equation actually does not scale linearly between 0 and 1, it  
113 jumps from 0 to  $Fuel_{low}/(Fuel_{high} - Fuel_{low})$ . I guess the equation should be  
114  $((FPMc+leafC)-Fuel_{low})/(Fuel_{high}-Fuel_{low})$ . Additionally, the equation is not defined for fuel density  
115 being equal to fuel<sub>low</sub> and fuel<sub>high</sub>.  
116

117 Reply: A great thanks to the reviewer for spotting this, the equation was changed to reflect this.

118 Changes in the manuscript: 1118. Eq. 5.

$$119 \quad FL_{PFT} = \begin{cases} 1 & \text{for } Fuel_{high} < (DPM_c + Leaf_{c,PFT}) \\ \frac{(DPM_c + Leaf_{c,PFT}) - Fuel_{low}}{Fuel_{high} - Fuel_{low}} & \text{for } Fuel_{low} \leq (DPM_c + Leaf_{c,PFT}) \leq Fuel_{high} \\ 0 & \text{for } Fuel_{low} > (DPM_c + Leaf_{c,PFT}) \end{cases}$$

120

121 l. 123: Here again, the normalization term should be  $(RH - RH_{low})/(RH_{up} - RH_{low})$ , C2 please rewrite

122 the equation similar to eq.5 to define the bounds for relative humidity being higher and lower then the

123 thresholds.

124

125 Reply: Again, thanks to the reviewer for spotting this and suggesting the edit

126 Changes in the manuscript: 1125.

$$127 \quad F_{PFT} = \begin{cases} e^* e^{-2R} FL_{PFT} (1 - \theta) & \text{for } RH_{up} < RH \\ e^* \frac{RH - RH_{low}}{RH_{up} - RH_{low}} e^{-2R} FL_{PFT} (1 - \theta) & \text{for } RH_{low} \leq RH \leq RH_{high} \\ 0 & \text{for } RH_{low} > RH \end{cases}$$

128

129 l. 127: FD is Fuel Density or Fuel density index? l. 126-127: which formula are you referring to?

130

131 Reply: FD (or now FL) stands for fuel load index here (this was clarified). We also clarified the term

132 further to avoid confusion.

133 Changes to the manuscript: 1129. fuel load (DPMc and Leafc,pft). (l. 153) Fuel Loaf index (FL)

134

135 l. 133: explain how the average burnt area was determined. There is no difference between temperate

136 and tropical trees?

137

138 Reply: We specified the average burnt area was *heuristically* determined. Far from stating this method

139 is perfect, we feel within this paragraph and the next we give enough justification for it while also

140 presenting the alternatives. Temperate and tropical trees are assigned the same average burnt area, for

141 simplicity.

142 Changes to the manuscript: 1137. Sub-categories of trees, grass and shrubs are not differentiated

143

144 l. 146: That suggests you should vary your pft specific burned area. Are there any indications in your

145 results that this is necessary? it might be rather a point for the discussion of your results.

146

147 Reply: This is difficult to ascertain without comparing earlier components (fire count or frequency).

148 Which we have not done for this paper (and INFERNO does not have the capability to produce fire count

149 estimates). Thank you to the reviewer for suggesting the discussion was a more appropriate location for

150 this point, which we have also extended upon.

151 Changes to manuscript: 1307-311. INFERNO's approach to burnt area only considers trees, grass and

152 shrub cover and was determined heuristically, meanwhile Hantson et al. (2014) found global fire size

153 was mostly influenced by precipitation, aridity and human activity (population density and croplands).  
154 Further parameterizations for fire size exist (e.g., Hantson et al., 2015, 2016) which could improve  
155 INFERNO burnt area estimates while maintaining simplicity and traceability.

156

157 1. 154: CCmin and CCmax are the same for leaves and stems.

158

159 Reply: Again, thanks to the reviewer for spotting this. CC (stem) was modified accordingly.

160 Changes to the manuscript: 1157. [...] and stems (CCmin = 0.0 and CCmax = 0.4) [...]

161

162 1. 158: I don't see why this makes it justifiable. more interesting would be why you changed the value,  
163 was it to tune the emissions?

164

165 Reply: We realize stating 'justifiable' implies GFED's assumptions should be mimicked. We have  
166 rephrased it to convey the message more effectively. We also go into more depth on the matter.

167 Changes to the manuscript: 1160-164. Nevertheless, GFED uses a more complex representation of  
168 moisture across multiple fuel types and only accounts for fires that were observed. In comparison, our  
169 scheme only relies on soil moisture and was much more sensitive to minimum combustion, such that the  
170 contribution from moist forested areas (e.g., rainforests) needed to be reduced by increasing the impact  
171 of soil moisture (reducing stems'  $CC_{min}$ ).

172

173 1. 200: what happens with population and lightning flash rates if JULES is not used in standalone version.

174

175 Reply: Ignition mode 2 is essentially the coupled version (to be refined and later submitted for  
176 publication): the lightning can be interactively simulated (population still needs to be prescribed or  
177 assumed as constant).

178 Changes to the manuscript: 1211-212. Interestingly, lightning can be interactively simulated in  
179 atmospheric models (not population), although this will not be explored in this paper.

180

181 1. 206-225: Give equations for the fire weather indices.

182 Reply: We have added equations for the more straightforward McArthur and Nesterov index. For the  
183 Canadian FWI we have only included the key equation, the full index is very complex and we refer back  
184 to the original papers for a detailed description.

185 Changes to manuscript: 1226-250. Equation 12-15 and related details in section 2.3. Appendix A now  
186 contains the equations used in the Canadian Fire Weather Index.

187

188 1. 254: How is the correlation computed? spatial or temporal? if temporal, is the correlation computed  
189 for each grid cell or just for the global total? please give significance levels.

190

191 Reply: Similar to previous point. This is spatial correlation, which is computed for each gridcell. We  
192 found p-values of 0 for both correlations (and these passed the t-test with 95% significance level). There  
193 are about 28000 grid-cells included in the analysis which explains the virtually 0 p-value here.

194 Changes to manuscript: 1292-296. INFERNO accurately diagnoses total fire occurrence and  
195 emissions over the 1997-2010 period: we found a spatial correlation of  $R=0.66$  for burnt area and  $R=0.59$   
196 for emitted carbon, both passing the t-test with 95% significance.

197

198 1. 258-262: I don't think the gridcell with maximum burned area is an important bench- mark. But what  
199 about seasonality? Emissions for the different sources given by GFED could also be interesting. or  
200 burned area separated for grass and woody pfts.

201

202 Reply: We wrote the maximum burnt area for two reasons: 1. It mirrors the emitted carbon, where the  
203 maximum is much more indicative of a model bias (with peat). 2. It remains important to assess whether  
204 INFERNO can assess extreme burnt area, and it adds a narrative to the article. Therefore, we would  
205 prefer to keep this point, while expanding others as suggested. Nevertheless, we will follow the  
206 suggestions of the reviewer and mention the main PFTs that contribute to burnt area, and emissions (C4  
207 grass and Broadleaf Evergreen Tree (Tropical)). More details were also added for peat-specific GFED  
208 emissions (see previous comment response).

209 Changes to manuscript: 1299-301. Over the studied period, C4 grass were the main contributors to burnt  
210 area in INFERNO (a mean  $2.34 \text{ Mkm}^2$  per year), meanwhile Broadleaf Evergreen Trees (Tropical) led  
211 to the most emitted carbon (a mean  $1.48 \text{ Pg}$  per year).

212

213 1. 264: the peat emissions given by GFED could be excluded here, are crop fires and emissions due to  
214 deforestation actually somehow included in the model? otherwise they could also be excluded.

215

216 Reply: Although these are not explicitly represented in the model, the function that estimates ignitions  
217 according to population density represents the various ways humans can interact with fires – including  
218 deforestation and crop fires (although in these simulations, crops are equivalent to grass). Peat and  
219 crop/deforestation fire emissions are different in that the latter are somehow accounted for (albeit not  
220 explicitly), while the former simply is not present in the land surface model, and thus in INFERNO. We  
221 detail the contribution of peat fires to GFED later in the discussion, and have expanded on that analysis.

222 Changes to manuscript: 1342-345. Furthermore, 2002 and 2006 also saw important peat burning, with  
223 GFEDv3 estimating peat emissions of 0.16 and 0.21  $\text{PgC}$  respectively. In both of these years, the trend  
224 in INFERNO differs from GFEDv3's (stagnation in 2002 and decrease in 2006).

225

226 1. 338: interestingly the mid latitudes are not well captured by the fire weather indices. might be the  
227 human influence? Including the other ignition modes of the model could give an indication why the  
228 model in better than the indices. Any significance values on the correlation?

229

230 Reply: Thanks the reviewer for this comment – we performed further analysis with ignition mode 3 and  
231 found a correlation coefficient of  $R=0.1617$  (lower than mode 1), suggesting our scheme for interactive  
232 human ignition is not able to improve estimates at mid-latitudes. We also performed a t-test (95%  
233 significance) on the values for correlations, and they were all passed successfully but for global and high  
234 latitudes for the McArthur index, and mid-latitude for the Nesterov index.

235 Changes to manuscript: Italics mean the correlation was not significant (p-value above 0.05).

236

237 I. 361: where did you show that the precipitation has an important impact?

238

239 Reply: During the analysis of our results we found precipitation varied significantly between the two  
240 driving datasets (CRUNCEP and WFDEI-GPCC). Still, we do not wish to do a full analysis of the causes  
241 for this discrepancy and its impact on INFERNO here, and chose to simply remove this confusing term  
242 (indeed Fig. 3 and Table 2 both show the impact of using a different meteorological dataset).

243 Changes to manuscript: l418. The use of different present-day meteorological datasets has an important  
244 impact on the magnitude and variability of our diagnostics.

245

246 I.370: You assessed the uncertainty of the ignitions by including the different ignition modes, but how  
247 does this dampen the impact of this uncertainty in inferno?

248

249 Reply: Thank you for the comment – the language was poorly chosen, and the purpose of these multiple  
250 ignition is to assess rather than dampen indeed.

251 Changes to manuscript: l428-429. Accordingly, we include different modes to examine the impact of  
252 ignitions (human or natural) in INFERNO.

253

254 I. 375: what do you mean by vaporized?

255

256 Reply: Thanks to the reviewer for this comment – vaporized was not the most accurate term here, we  
257 modified the sentence accordingly.

258 Changes to manuscript: l434-436. For instance, litter influences flammability but only live vegetation  
259 leads to emissions while in reality litter significantly contributes to observed fuel consumption (van  
260 Leeuwen et al., 2014).

261

262 I. 379-382: I don't understand. what do you mean by INFERNO's meteorological and hydrological  
263 assimilation? In what sense are the other fire schemes more specialized?

264

265 Reply: This was referring to the way INFERNO assimilates weather and water. However, the goal of  
266 this sentence is to advise anyone that would develop INFERNO further to keep its 'simplicity and  
267 linearity'. We have changed the sentence to reflect this. What we meant by specialized fire scheme is  
268 more often referred to as 'process-based models'.

269 Changes to manuscript: 1440-441. The value of this model being its simplicity and linearity, any  
270 improvements to INFERNO should follow this vision; complex parameterizations are better suited for  
271 process-based fire schemes (e.g., Lasslop et al., 2014; Li et al., 2013, p.1).

272

273 Fig.A1: label the subpanels. why does the temperature function not scale between 0 and 1?

274

275 Reply: Regarding the temperature, we chose to restrict the display here to the range of realistic  
276 temperatures observed on Earth (similarly, precipitation and fuel density are restricted to the 'key'  
277 location of their representative functions). Regarding the request to label the subpanels – it's now done.

278 Changes to manuscript: 1452. Updated Fig. A1 and changed its caption to:

279 Fig. A1. The mathematical functions used for individual dependencies of INFERNO on key driving  
280 variables for flammability (a,b,c,d,e) and ignitions (f), within the range of reasonable earth observations.

281 Note the population density only influences the model output if ignition mode 3 is selected (interactive  
282 lightning and human ignition).

283

284 **Reviewer 2 –**

285 Review

286 INFERNO: A fire and emissions scheme for the Met Office's Unified Model

287 Mangeon et al. This paper describes a simplified model that projects biomass burning activity, burnt  
288 area, and emissions globally. The model framework uses climatic and meteorological inputs and land  
289 cover characteristics to drive the emissions model. The ignition sources can be varied, and, for the  
290 purposes of the model evaluation presented, are prescribed three different ways in order to assess the  
291 sensitivity of the model to different ignition parameterizations. The land cover inputs are provided by  
292 the JULES model. The fire model is run for current conditions and compared with other fire model  
293 outputs (primarily GFED).

294

295 This paper is written extremely well, and the modeling tool described is a unique contribution. It uses  
296 different approaches than other available models that project fires in global climate models and will be  
297 a useful tool to be incorporated within the UK Met Office's Earth System Model. The assumptions made  
298 in the model parameterizations are reasonable and well justified throughout. The manuscript is very  
299 appropriate for Geoscientific Model Development, and I recommend publication after only minor  
300 comments that I provide here.

301

302 General Comments:

303 Section 2.2: How are the PFTs allocated within each grid cell? This is not explained thoroughly in Section  
304 2.2, and the paper cited as a reference is still "in prep".

305



306 Reply: Given the paper is about fire and there's no feedback on vegetation, we would prefer not to detail  
307 this further. However, we have made this more explicit in the manuscript and the reference (now accepted  
308 in GMD).

309 Changes in manuscript: 1293-195. Fractional coverage of PFTs in any gridcell is based on competition  
310 for resources (light and water), and governed by Lotka-Volterra competition equations, and based on a  
311 tree-shrub-grass dominance hierarchy (Cox, 2001).

312

313 Section 2.3: Emissions from Akagi et al. (2011) have been updated and can be incorporated within future  
314 versions (see Section 3 at <http://bai.acom.ucar.edu/Data/fire/>).

315

316 Reply: Now mentioned in the text

317 Change in the manuscript: 1168-169. Section 2.1.5, added: "Updated EFs for Akagi et al. (2011) were  
318 not used in this version of INFERNO, these can be found in section 3 of:  
319 <http://bai.acom.ucar.edu/Data/fire/>"

320

321 Section 4: I was confused about the fact that there were two different versions of "GFEDv4" used to  
322 evaluate the INFERNO estimates. Can this be made more clearly? (i.e., better define and label the two  
323 different outputs)?

324

325 Reply: Clarification added in new paragraph on datasets used for comparison (which describes datasets  
326 compared to). Also improved the legend in figure 3 (v4 + small fires).

327 Changes in manuscript: 1272-287 (new paragraph) and Fig. 3 GFEDv4s (v4 + small fires).

328

329 Lines 255 and following sentences: Please clarify which model (INFERNO v GFED) was higher/lower.  
330 For example, Line 255 can be re-written:

331 "We notice that the burnt area predicted by INFERNO is higher in

332 all regions other than Australia and New Zealand, and southern hemisphere Africa when compared to  
333 GFED4."

334

335 Reply: Rephrased this sentence to clarify the comparison

336 Changes in manuscript: 1295-296. Compared to GFEDv4, we notice INFERNO estimates higher burnt  
337 area in all regions apart from Australia and New Zealand, and southern hemisphere Africa.

338

339 Paragraph starting at line 325: Is it possible to compare the fire indices calculated here with the real data  
340 for current conditions?

341

342 Reply: Fire indices were developed as a means to assess fire dangers, within specific biomes, while they  
343 did not aim to assess 'real data' like burnt area. However, by assessing the R-coefficient with GFED  
344 burnt area we study the variability of the indices, and their capacity to mimic the variability observed in

345 'real data'. This comparison makes fire indices analogous to INFERNO's flammability, which in ignition  
346 mode 1 (used in this comparison with fire indices), is the only source of variability.  
347 Changes in manuscript: 1386-388. This analysis relies on the assumption that fire indices can be used as  
348 a proxy for the variability of fire occurrence and spread, and eventually of burnt area (not the magnitude).

349

350 Figure 3: Why are not GFAS and FINN outputs compared in both panels of the figure?

351

352 Reply: Neither of the original papers presented results for the other category, i.e. FINN  
353 (<http://www.geosci-model-dev.net/4/625/2011/gmd-4-625-2011.html>) does not contain information on  
354 Emitted Carbon (although it does on Biomass burned, conversion is not obvious). Meanwhile GFAS  
355 does not estimate burnt area. Accordingly, we also use GFAS, GFEDv3 and FINN to examine specific  
356 species.

357 Changes to the manuscript: Table 3. & 1272. Evaluation was performed against the published data for  
358 GFEDv3, FINNv1, GFAS and GFEDv4.

359

360 Editorial Comments:

361 Title: The UK Met Office should be defined in the title.

362 Reply: The title now includes UK. However due to branding Met Office should remain so (rather than  
363 Meteorological Office).

364 Changes to manuscript: title: 11. INFERNO: a fire and emissions scheme for the UK Met Office's Unified  
365 Model.

366

367 Lines 59 and 60: The present tense should be applied (i.e., change "used" to "uses")

368 Reply: OK

369 Changes to manuscript: 160-62. In short, that parameterization uses monthly mean temperature, relative  
370 humidity and precipitation to simulate fuel flammability. It also uses human population density and  
371 lightning to represent ignitions.

372

373 Line 67: Add a comma after (Ex)

374 Reply: OK

375 Changes to manuscript: 168 (Ex), and

376

377 Line 168: It may be useful to let the reader know that [C] will be described in the next section.

378

379 Reply: To an extent we felt the next section did not describe this well enough, therefore we modified this  
380 sentence to be more explicit.

381 Changes to manuscript: 1175-176. and [C] is the dry biomass carbon content which we assume as 50%  
382 (a common simplification; Lamblom and Savidge, 2003).

383

384 Line 180 (and elsewhere): When “which” is used, there should be a comma preceding it. In this case,  
385 there should be a comma after “(see Eq. 6.8)”  
386  
387 Reply: Yes, because the clause is restrictive here, “which” should be preceded by a comma.  
388 Changes to manuscript: 1187. (see Eq. 6.8), which  
389  
390 Line 182: Layers should be plural  
391  
392 Reply: Yes, thanks  
393 Changes to manuscript: 1189. Layers  
394  
395 Line 258: I recommend changing “observes” to “projects” (or something like that).  
396  
397 Reply: Thanks to the reviewer for this suggestion that we applied.  
398 Changes to manuscript: 1301. “GFEDv4 projects the” ... note: we have also changed all mentions of  
399 GFED4 to GFEDv4 for consistency.  
400  
401 Line 328: condition should be plural  
402  
403 Reply: Yes  
404 Changes to manuscript: 1385. same vegetation conditions  
405  
406 Line 365-6: Should this be “...presence of an anthropogenic ignition source.”  
407  
408 Reply: The point we were trying to make would apply to both anthropogenic and lightning-started fires.  
409 Albeit it was not clear, which we tried to improve (see changes below).  
410 Changes to manuscript: 1422-424. Similarly, lightning appears to more frequently ignite fires in wet  
411 environments (rainforests) while flammable environments (savannah, grasslands) with rarer lightning  
412 are sensitive to the presence of an anthropogenic ignition source.  
413  
414 Line 375-376: a citation should be given.  
415  
416 Reply: The sentence was slightly changed upon reading the study now cited (van Leeuwen et al., 2014)  
417 and to improve its flow.  
418 Changes to manuscript: 1435. The sentence now reads: “For instance, litter influences flammability but  
419 only live vegetation is vaporized while in reality litter significantly contributes to observed fuel  
420 consumption (van Leeuwen et al., 2014).”

# 1 INFERNO: a fire and emissions scheme for the UK Met 2 Office's Unified Model

3 Stephane Mangeon<sup>1,2</sup>, Apostolos Voulgarakis<sup>1</sup>, Richard Gilham<sup>2</sup>, Anna Harper<sup>3</sup>,  
4 Stephen Sitch<sup>4</sup>, Gerd Folberth<sup>2</sup>

5 <sup>1</sup>Department of Physics, Imperial College London, London, United Kingdom

6 <sup>2</sup>Met Office, FitzRoy Road, Exeter, EX1 3PB, UK

7 <sup>3</sup>College of Engineering, Mathematics, and Physical Sciences, University of Exeter, Exeter, UK

8 <sup>4</sup>College of Life and Environmental Sciences, University of Exeter, Exeter, UK

9 *Correspondence to:* Stéphane Mangeon (stephane.mangeon12@imperial.ac.uk)

10 **Abstract.** Warm and dry climatological conditions favour the occurrence of forest fires. These fires then  
11 become a significant emission source to the atmosphere. Despite this global importance, fires are a local  
12 phenomenon and are difficult to represent in a large-scale Earth System Model (ESM). To address this,  
13 the Interactive Fire and Emission algoRithm for Natural enviroNments (INFERNO) was developed.  
14 INFERNO follows a reduced complexity approach and is intended for decadal to centennial scale climate  
15 simulations and assessment models for policy making. Fuel flammability is simulated using temperature,  
16 relative humidity, fuel ~~load~~ as well as precipitation and soil moisture. Combining flammability with  
17 ignitions and vegetation, burnt area is diagnosed. Emissions of carbon and key species are estimated  
18 using the carbon scheme in the JULES land surface model. JULES also possesses fire index diagnostics  
19 which we document and compare with our fire scheme. We found INFERNO captured global burnt area  
20 variability better than individual indices, and these performed best for their native regions. Two  
21 meteorology datasets and three ignition modes are used to validate the model. INFERNO is shown to  
22 effectively diagnose global fire occurrence (R=0.66) and emissions (R=0.59) through an approach  
23 appropriate to the complexity of an ESM, although regional biases remain.  
24

Deleted: density

26 **1 Introduction**

27 Fire is a key interaction between the atmosphere and the land surface (Bowman et al., 2009). Its impacts  
28 are wide-ranging: it influences forest succession (Bond and Keeley, 2005), is a tool for deforestation  
29 (van der Werf et al., 2009) and is an important natural carbon source (Bowman et al., 2013), while it also  
30 provides a major natural hazard to humans through property and infrastructure destruction and air quality  
31 degradation (Johnston et al., 2012; Marlier et al., 2013). Not only are biomass burning emissions  
32 substantial in magnitude (Lamarque et al., 2010), they also drive the variability of atmospheric  
33 composition (Spracklen et al., 2007; Voulgarakis et al., 2010, 2015) and impact short-term climate  
34 forcing (Tosca et al., 2013).

35 There are feedbacks between fire and climate: low-humidity conditions cause droughts, which enhance  
36 fire activity (Field et al., 2009), which, in turn, emits aerosols and trace gases (Akagi et al., 2011),  
37 influencing the abundances of radiatively active atmospheric constituents, cloud formation and lifetime,  
38 and in turn precipitation, and surface albedo (Voulgarakis and Field, 2015). Bistinas et al. (2014) showed  
39 global fire frequency is correlated with land-use, vegetation type and meteorological factors (dry days,  
40 soil moisture and maximum temperature) and human presence tends to noticeably reduce fire activity  
41 (land-management, landscape fragmentation and urbanization). Examining and quantifying such impacts  
42 and feedbacks is paramount to Earth System Models (ESMs), yet to integrate vegetation fires presents  
43 many challenges as it intricately links multiple disciplines from ecology to atmospheric chemistry and  
44 physics and climate science.

45 Integration of fires into Dynamic Global Vegetation Models (DGVMs) was the first step towards fire  
46 within ESMs (e.g. (Arora and Boer, 2005; Fosberg et al., 1999; Li et al., 2012; Pfeiffer et al., 2013; Sitch  
47 et al., 2003; Thonicke et al., 2001, 2010; Venevsky et al., 2002; Yue et al., 2014). Vegetation fires have  
48 been implemented into only a few ESMs, e.g. ECHAM (Lasslop et al., 2014) and the Community ESM  
49 (Li et al., 2013, 2014, p.2).

50 Here, we present and evaluate the INteractive Fire and Emission algoRithm for Natural enviroNments  
51 (INFERNO) and its implementation. INFERNO is a necessarily simple parameterization that focuses on  
52 the large-scale occurrence of fires and is suitable for ESM application. The model uses a few key driving  
53 variables while retaining a broadly accurate parameterization for fire emissions. INFERNO's  
54 performance against observations and well established and operationally relevant fire indices is  
55 presented.

56 **2 Model description**

57 **2.1 INFERNO**

58 INFERNO was constructed upon the simplified parameterization for fire counts proposed and evaluated  
59 for the present-day by (Pechony and Shindell, 2009), which was subsequently shown to provide a good  
60 estimate for large-scale fire variability over climatological timescales (Pechony and Shindell, 2010). In  
61 short, that parameterization uses ~~monthly mean temperature, relative humidity and precipitation to~~  
62 simulate fuel flammability. It also uses ~~human population density and lightning to represent ignitions.~~  
63 To incorporate this parameterization within the Joint UK Land Environment Simulator (JULES, Best et

Deleted: d  
Deleted: d

66 al., 2011; Clark et al., 2011), several changes were applied. Upper layer soil moisture is used to represent  
 67 precipitation memory while precipitation acts as a rapid fire deterrent. Vegetation Density was replaced  
 68 by Fuel Load index, dependent on leaf carbon and Decomposable Plant Material (DPM), i.e. litter. Such  
 69 a relationship with fine fuel and moisture was used in Thonicke et al. (2001). Furthermore, we developed  
 70 a parameterization to obtain burnt area (BA), emitted carbon (EC) and fire emissions of different species  
 71 ( $E_X$ ), and our fire diagnostics are made for each of the nine Plant Functional Types (PFTs) in the current  
 72 version of JULES (Harper et al., 2016).  
 73 Figure 1 summarizes the mechanisms of INFERNO, and Fig. A1 illustrates the dependence of INFERNO  
 74 on individual driving variables.

Deleted: Density  
 Deleted: an index

Deleted: submitted

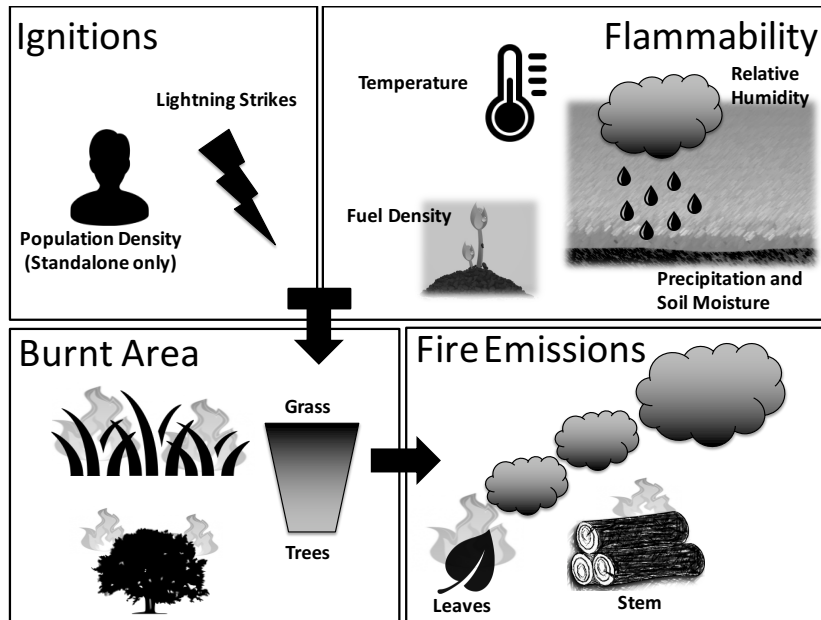

75  
 76 Fig. 1. Schematic summarizing the Interactive Fire and Emission algoRithm for Natural enviroNments  
 77 (INFERNO) and its key components and behaviour. Ignitions can be accounted for in a variety of ways (see  
 78 Sect. 2.1.1), meteorology influences flammability (see Sect. 2.1.2), while plant coverage influences burnt area  
 79 (see Sect. 2.1.3), finally emissions are calculated according to leaf and stem carbon for each PFT (see Sect.  
 80 2.1.4).

81 **2.1.1 Ignitions ( $I$ )**

82 INFERNO calculates ignitions in either one of three modes:  
 83 First, we can assume constant or ubiquitous ignitions, currently calibrated to a global average of  $I_T =$   
 84  $1.67 \text{ ignitions km}^{-2} \text{ month}^{-1}$ . This corresponds to  $1.5 \text{ ignitions km}^{-2} \text{ month}^{-1}$  due to humans ( $I_A$ ),  
 85 heuristically determined, and  $0.17 \text{ ignitions km}^{-2} \text{ month}^{-1}$  natural ignitions due to lightning ( $I_N$ ), derived  
 86 from the multi-year annual mean of  $2.7 \text{ strikes km}^{-2} \text{ year}^{-1}$  (Huntrieser et al., 2007) assuming 75% of  
 87 strikes being cloud-to-ground (Prentice and Mackerras, 1977). This mode inherently suppresses the  
 88 variability in fires due to any anthropogenic or natural ignition changes (Pechony and Shindell, 2009,  
 89 2010).

93 Second, human ignitions and suppressions can be assumed to remain constant at the global mean value  
 94 mentioned above ( $I_A = 1.5$  ignitions  $\text{km}^{-2} \text{month}^{-1}$ ), however cloud-to-ground lightning strikes may vary,  
 95 and in addition each strike is assumed to start a fire. This mode accounts for natural variability in fire  
 96 ignitions, which can be simulated within an ESM, or prescribed from observations.

97 Third, varying human ignitions and suppressions and varying natural ignitions (cloud-to-ground  
 98 lightning strikes, as in mode 2). This was the original ignition approach in Pechony and Shindell (2009),  
 99 which was left unchanged and is detailed below. In this ignition mode, anthropogenic ignition and  
 100 suppression depends on population density ( $PD$ ), as proposed by Venevsky et al. (2002).

$$101 I_A = k(PD) PD^\alpha \quad (1)$$

102  $PD$  is in units of people  $\text{km}^{-2}$ , and  $k(PD) = 6.8 \times PD^{-0.6}$  is a function that represents the varying  
 103 anthropogenic influence on ignitions in rural versus urban environments. The parameter  $\alpha = 0.03$   
 104 represents the number of potential ignition sources per person per month per  $\text{km}^2$ . Both natural and  
 105 anthropogenic ignitions have the potential to be suppressed by humans, such that the fraction of fires not  
 106 suppressed is:

$$107 f_{NS} = 7.7 (0.05 + 0.9 \times e^{-0.05 PD}) \quad (2)$$

108 Equation 2 includes a scaling factor of 7.7 (Pechony and Shindell, 2009) originally introduced to calibrate  
 109 the number of fires to MODIS observations. Total ignitions ( $I_T$ , in units, ignitions  $\text{m}^{-2} \text{s}^{-1}$ ) can be  
 110 represented as (Eq. 3):

$$111 I_T = (I_N + I_A) f_{NS} / (8.64 \times 10^{10}) \quad (3)$$

112 Here  $f_{NS} = 1$  for mode 1 and 2, and follows eq. 2 for mode 3. Dividing by  $8.64 \times 10^{10}$  converts  
 113 ignitions  $\text{km}^{-2} \text{month}^{-1}$  to ignitions  $\text{m}^{-2} \text{s}^{-1}$ .

### 114 2.1.2 Flammability ( $F$ )

115 We adapt the (Pechony and Shindell, 2009) scheme for flammability to function interactively within an  
 116 ESM (see Eq. 6). Starting from the saturation vapour pressure ( $e^*$ , Eq. 4; Goff and Gratch, 1946) and  
 117 its temperature dependence, we introduce a Fuel Load index ( $FL_{PFT}$ , Eq. 5) as well as Relative Humidity  
 118 ( $RH$ ), precipitation and soil moisture in order to obtain Flammability (Eq. 6). The land surface model  
 119 (JULES) determines soil moisture content ( $\theta$ ) and fuel load ( $DPM_C$  and  $Leaf_{C,PFT}$ ).

$$120 \log_{10}(e^*) = a \left( \frac{T_s}{T} - 1 \right) + b \log_{10} \left( \frac{T_s}{T} \right) + c \left( 10^{d \left( 1 - \frac{T_s}{T} \right)} - 1 \right) + f \left( 10^{h \left( \frac{T_s}{T} - 1 \right)} - 1 \right) \quad (4)$$

121 As illustrated in Eq. 4, INFERNO utilizes temperature ( $T$  in K, at 1.5 m height). The Goff-Gratch (Eq.  
 122 4) uses the constants:  $a = -7.90298$ ;  $b = 5.02808$ ;  $c = -1.3816 \times 10^{-7}$ ;  $d = 11.344$ ;  $f = 8.1328 \times$   
 123  $10^{-3}$ ;  $h = -3.49149$  and the water boiling point temperature  $T_s = 373.16$  K.

$$124 FL_{PFT} = \begin{cases} 1 & \text{for } Fuel_{high} < (DPM_C + Leaf_{C,PFT}) \\ \frac{(DPM_C + Leaf_{C,PFT}) - Fuel_{low}}{Fuel_{high} - Fuel_{low}} & \text{for } Fuel_{low} \leq (DPM_C + Leaf_{C,PFT}) \leq Fuel_{high} \\ 0 & \text{for } Fuel_{low} > (DPM_C + Leaf_{C,PFT}) \end{cases} \quad (5)$$

125 Equation 5 shows  $FL_{PFT}$  is taken as the PFT-specific leaf carbon ( $Leaf_{C,PFT}$ , aboveground) plus the  
 126 carbon within decomposable plant material ( $DPM_C$ ).  $DPM$  is a soil carbon pool of which we assume  
 127 70% is available to fires i.e. near-surface ( $DPM$  is shared across all PFTs).  $FL$  scales linearly between 0  
 128 (at a threshold of  $Fuel_{low} = 0.02$   $\text{kgC m}^{-2}$ ) and 1 (at a threshold of  $Fuel_{high} = 0.2$   $\text{kgC m}^{-2}$ ). Similar

Moved down [1]: Assuming no suppression for the first two ignition modes ( $f_{NS} = 1$ ), Deleted: t

Moved (insertion) [1] Deleted: Assuming no suppression for the first two ignition modes ( Deleted: ) Deleted: ,

Deleted: Density

Deleted:  $D^{\otimes}$

Deleted: density

Deleted:  $FD$

Deleted: )

Deleted:  $D^{\otimes}$

Deleted: <

Deleted: <

Deleted: -

Formatted: Justified

Deleted:  $FD$

Deleted:  $D$

147 approaches to represent fuel availability within fire parameterizations have commonly been adopted  
 148 (Arora and Boer, 2005; Li et al., 2012; Thonicke et al., 2010).

$$149 F_{PFT} = \begin{cases} e^* \frac{RH - RH_{low}}{RH_{up} - RH_{low}} e^{-2R} FL_{PFT} (1 - \theta) & \text{for } RH_{low} \leq RH \leq RH_{high} \\ e^* e^{-2R} FL_{PFT} (1 - \theta) & \text{for } RH_{up} < RH \\ 0 & \text{for } RH_{low} > RH \end{cases} \quad (6)$$

150  $RH$  is the relative humidity (%) and  $R$  is the precipitation rate ( $\text{mm day}^{-1}$ ). The influence of relative  
 151 humidity ( $RH$ ) scales between (and is bound by): 0 (at a threshold of  $RH_{low} = 10\%$ ) and 1 (at a threshold  
 152 of  $RH_{up} = 90\%$ ). We then adapt the formula by replacing a vegetation index dependent on leaf area  
 153 index with the Fuel Load index ( $FL$ ). Finally, Flammability ( $F_{PFT}$ ) is dependent on upper-level (down  
 154 to 0.1 m) soil moisture:  $\theta$  is the unfrozen soil moisture as a fraction of saturation. The individual  
 155 importance of these variables to our model is illustrated in Fig. A1.

### 156 2.1.3 Burnt Area ( $BA$ )

157 Our approach is to associate an average burnt area per fire to each PFT, effectively decoupling the fire-  
 158 spread stage from local meteorology and topography, which is typically not resolved in the relatively  
 159 coarse grid of an ESM. An average burnt area ( $\overline{BA_{PFT}}$ ) was heuristically determined for each PFT: 0.6,  
 160 1.4 and 1.2  $\text{km}^2$  for trees, grass and shrubs, respectively, such that grass and shrubs will fuel larger fires  
 161 than trees. Sub-categories of trees, grass and shrubs are not differentiated. Observational evidence  
 162 supports that the land cover type is an efficient way to characterize fires, which tend to be larger in  
 163 grasslands than in forests (Chuvieco et al., 2008; Giglio et al., 2013). The  $BA$  is then calculated following  
 164 Eq. 7:

$$165 BA_{PFT} = I_T F_{PFT} \overline{BA_{PFT}} \quad (7)$$

166 Here  $BA_{PFT}$  is the burnt area (fraction of PFT cover burnt per second) for each PFT; meanwhile the  
 167 number of ignitions times the flammability ( $I_T F_{PFT}$ ) represents the number of fires.  
 168 Inferring burnt area from number of fires in this manner stands out from other fire models which utilize  
 169 wind speed (Arora and Boer, 2005; Thonicke et al., 2010; Li et al., 2012), effectively modelling the fire  
 170 rate of spread. Wind is key to the modelling of individual fires; yet implementing wind effectively within  
 171 fire models designed for the relatively coarse grid of ESMs was found to be problematic (Lasslop et al.,  
 172 2014, 2015). Conversely, Hantson et al. (2014) found global fire size was mostly influenced by  
 173 precipitation, aridity and human activity (population density and croplands).

### 174 2.1.4 Emitted Carbon ( $EC$ )

175 To account for the wetness of fuel in INFERNO, combustion completeness (the fraction of biomass  
 176 exposed to a fire that was volatilized) scales linearly with soil moisture (as a fraction of saturation) with  
 177 different upper and lower boundaries for leaf and stem carbon.

$$178 EC_{PFT} = BA_{PFT} \sum_{leaf, stem}^i (CC_{min,i} + (CC_{max,i} - CC_{min,i})(1 - \theta)) C_i \quad (8)$$

179 Equation 8 shows how the PFT-specific emitted carbon ( $EC$ , in  $\text{kgC m}^{-2} \text{s}^{-1}$ ) is computed.  $BA$  is the burnt  
 180 area (fraction  $\text{s}^{-1}$ ),  $CC_{min}$  and  $CC_{max}$  are the minimum and maximum combustion completeness for both  
 181 leaves ( $CC_{min} = 0.8$  and  $CC_{max} = 1.0$ ) and stems ( $CC_{min} = 0.0$  and  $CC_{max} = 0.4$ ).  $C_i$  is the carbon  
 182 stored in each PFT's leaves or stems ( $\text{kgC m}^{-2}$ ). The parameters used for combustion completeness

Deleted:

Deleted:  $F_{PFT} = e^* (RH_{up} - RH) / (RH_{up} - RH_{low}) e^{-2R} FD_{PFT} (1 - \theta)$  (6)

Deleted: Density

Deleted: index

Deleted: FD

Deleted:

Deleted: 8

Deleted: 1

Deleted: 0



194 ( $CC_{min}$  and  $CC_{max}$ ) are similar to the Global Fire Emission Database (GFED, van der Werf et al., 2010),  
 195 albeit with lower minimum combustion of stems (0.0 as opposed to 0.2). ~~Nevertheless, GFED uses a~~  
 196 ~~more complex representation of moisture across multiple fuel types and only accounts for fires that were~~  
 197 ~~observed. In comparison, our scheme only relies on soil moisture and was much more sensitive to~~  
 198 ~~minimum combustion, such that the contribution from moist forested areas (e.g., rainforests) needed to~~  
 199 ~~be reduced by increasing the impact of soil moisture (reducing stems'  $CC_{min}$ ).~~

**Deleted:** (

**Deleted:** This change is justifiable by the difference in the moisture used. Indeed

**Deleted:** , while our scheme only relies on soil moisture.

### 200 2.1.5 Emitted Species ( $E_X$ )

201 There has been a significant amount of work on estimating emission factors (EFs) across fire biomes  
 202 (such as savannahs, boreal forest etc.). This was synthesized in Akagi et al. (2011) as well as Andreae  
 203 and Merlet (2001) and its updates. ~~Updated EFs for Akagi et al. (2011) were not used in this version of~~  
 204 ~~INFERNO, these can be found in section 3 of: <http://bai.acom.ucar.edu/Data/fire/>.~~ To convert biome-  
 205 specific EFs to PFT specific EFs, each PFT was linked to a fire biome (see Table A1). INFERNO uses  
 206 these to estimate emissions (Eq. 9).

**Deleted:** these

$$207 E_{X,PFT} = EC_{PFT} EF_{X,PFT} / [C] \quad (9)$$

208 Here  $E_X$  is the amount of species X emitted by fires (in  $\text{kg m}^{-2} \text{s}^{-1}$ ),  $EC$  is the emitted carbon (in  $\text{kgC m}^{-2}$   
 209  $\text{s}^{-1}$ ) and  $EF_X$  is the PFT-specific emission factor (see Table 1) (in kg of species emitted per kg of biomass  
 210 burnt), and  $[C]$  is the dry biomass carbon content ~~which we assume as 50% (a common simplification;~~  
 211 ~~Lamom and Savidge, 2003). INFERNO currently provides emissions for basic trace gases:  $\text{CO}_2$ ,  $\text{CO}$ ,  
 212  $\text{CH}_4$ ,  $\text{NO}_x$ ,  $\text{SO}_2$  and aerosols: organic carbon (OC) and black carbon (BC).~~

**Deleted:** , express as a percentage

**Deleted:** (

213 **Table 1. INFERNO's emission factors per PFT created from the emission profiles in Akagi et al. (2011), such**  
 214 **that each PFT was attributed a fire biome (see Suppl. 2). This method of attributing emission factors to PFTs**  
 215 **is similar to that presented in Thonicke et al. (2010), and can be extended to include all species of trace gases**  
 216 **and aerosols compiled in Akagi et al. (2011).**

| Emission Factors (g / kg)                   | $\text{CO}_2$ | $\text{CO}$ | $\text{CH}_4$ | $\text{NO}_x$ | $\text{SO}_2$ | OC    | BC     |
|---------------------------------------------|---------------|-------------|---------------|---------------|---------------|-------|--------|
| <b>Broadleaf Evergreen Tree (Tropical)</b>  | 1643          | 93          | 5.07          | 2.55          | 0.40          | 4.71  | 0.52   |
| <b>Broadleaf Evergreen Tree (Temperate)</b> | 1637          | 89          | 3.92          | 2.51          | 0.40*         | 8.2** | 0.56** |
| <b>Broadleaf Deciduous Tree</b>             | 1643          | 93          | 5.07          | 2.55          | 0.40          | 4.71  | 0.52   |
| <b>Needleleaf Evergreen Tree</b>            | 1637          | 89          | 3.92          | 2.51          | 0.40*         | 8.2** | 0.56** |
| <b>Needleleaf Deciduous Tree</b>            | 1489          | 127         | 5.96          | 0.90          | 0.40*         | 8.2** | 0.56** |
| <b>C3 grass</b>                             | 1637          | 89          | 3.92          | 2.51          | 0.40*         | 8.2** | 0.56** |
| <b>C4 grass</b>                             | 1686          | 63          | 1.94          | 3.9           | 0.48          | 2.62  | 0.37   |
| <b>Evergreen Shrub</b>                      | 1637          | 89          | 3.92          | 2.51          | 0.40*         | 8.2** | 0.56** |
| <b>Deciduous Shrub</b>                      | 1489          | 127         | 5.96          | 0.90          | 0.40*         | 8.2** | 0.56** |

217 \*Profile not available in Akagi et al. (2011), therefore we mimic tropical forests; \*\*from Andreae and Merlet (2001).

## 225 2.2 Implementation within JULES

226 INFERNO is currently implemented within the Joint UK Land Environment Simulator (JULES). (Best  
227 et al., 2011; Clark et al., 2011) its carbon fluxes and vegetation dynamics. The results shown here used  
228 JULES v4.3.1 and INFERNO will be included in JULES from version 4.5 onwards. INFERNO utilizes  
229 soil moisture (see Eq. 6,8), which JULES calculates as the balance between precipitation (following the  
230 scheme for rainfall interception in (Johannes Dolman and Gregory, 1992)) and extraction by  
231 evapotranspiration and runoff (Cox et al. 1999; Best et al. 2011). JULES has four soil layers, and  
232 INFERNO uses the top layer unfrozen soil moisture (0 to 0.1 m depth). Note that in its current state,  
233 JULES does not associate carbon pools with depths, hence it is not possible to access the top-most DPM  
234 only for example. The vegetation dynamics and litter carbon used obey the TRIFFID DGVM (Cox,  
235 2001). Fractional coverage of PFTs in any gridcell is based on competition for resources (light and  
236 water), and governed by Lotka-Volterra competition equations, and based on a tree-shrub-grass  
237 dominance hierarchy (Cox, 2001).

238 In JULES, vegetation carbon content is determined by the balance between photosynthesis, respiration,  
239 and litterfall. Within JULES, TRIFFID (the Top-down Representation of Foliage and Flora Including  
240 Dynamics; Cox, 2001) predicts changes in biomass and the fractional coverage of nine plant functional  
241 types (Table A1) based on accumulated carbon fluxes and height-based competition, where the tallest  
242 trees have the first access to space (Harper et al. *In Prep*). Vegetation can grow in height, and the carbon  
243 in leaves, roots, and wood is related allometrically to the “balanced LAI”,  $L_b$  (Cox, 2001).  $L_b$  is the  
244 seasonal maximum leaf area index (LAI) and a function of plant height. Within INFERNO, leaf carbon  
245 ( $Leaf_c$ , used for calculating FD and emissions) is:

$$246 Leaf_c = \sigma_l L_b \quad (10)$$

247 Meanwhile, wood carbon ( $Wood_c$ , which affects emissions), is calculated as:

$$248 Wood_c = a_{wl} L_b^{b_{wl}} \quad (11)$$

249 PFT dependent parameters ( $\sigma_l$ , the Specific Leaf Density,  $a_{wl}$ , the allometric coefficient and  $b_{wl}$ , the  
250 allometric exponent) are given in Table A1.

251 When using JULES in its standalone version, INFERNO can use inputs of population density (in people  
252  $\text{km}^{-2}$ ) and cloud-to-ground lightning flash rates (in flashes  $\text{km}^{-2} \text{month}^{-1}$ ) from ancillary datasets.  
253 Interestingly, lightning can be interactively simulated in atmospheric models (not population), although  
254 this will not be explored in this paper. Similarly, meteorology needs to be prescribed and is then  
255 interpolated from its native temporal resolution to the model’s time-step. Although designed to be  
256 integrated within an ESM, the capability to run INFERNO with JULES only is particularly useful for  
257 present-day comparison with observations, and to dissociate causes of biases in results. In its current  
258 early state, INFERNO provides a diagnostic tool, it does not remove carbon from vegetation nor does it  
259 lead to tree mortality.

## 260 2.3 Fire Weather Indices

261 Three other well-established daily fire indices are also available within JULES. These indices have been  
262 used for several decades to help plan operational response to wildfires on Numerical Weather Predictions

Field Code Changed

Formatted: Check spelling and grammar

Formatted: Default Paragraph Font, Font:10 pt

Field Code Changed

Formatted: Check spelling and grammar

Deleted: et al.

Deleted: et al.

Deleted:

266 (NWP) timescales. Although unit-less and ill-defined risk-based quantities, comparison to INFERNO is  
 267 still useful for understanding the results in the context of practically established metrics.

268 The Canadian Fire Weather Index (Forestry Canada, 1992; Van Wagner and Pickett, 1985) consists of  
 269 six components, calculated from basic meteorological parameters. Three are fuel moisture codes  
 270 designed to represent the drying of different fuel types, their characteristics are displayed in Table A2.  
 271 Two intermediate quantities, the Initial Spread Index and the build-up index are calculated from these,  
 272 and are in turn used to yield the final Fire Weather Index (FWI):

$$273 \quad FWI = \begin{cases} e^{2.72(0.434 \ln B)^{0.647}}, & B > 1 \\ B, & B \leq 1 \end{cases} \quad (12)$$

274 where  $B = 0.1 ISI FD$  with  $ISI$  the Initial Spread Index and  $FD$  the Fuel Density. We refer to the  
 275 original publications for detailed equations for the complex Canadian FWI and each of its components.  
 276 The McArthur Forest Fire Danger Index (Noble et al., 1980; Sirakoff, 1985) was developed for use in  
 277 Australia. Simpler in its formulation than the Canadian index, it consists of a drought component  
 278 modified by the local temperature, humidity and wind speed. The calculation of the drought component  
 279 depends on the soil moisture deficit (the amount of water needed to restore the soil moisture content of  
 280 the top 800 mm of soil to 200 mm), which is related to the JULES soil moisture.

281 The FFDI ( $F_{McArthur}$ ) is given by:

$$282 \quad F_{McArthur} = 1.275 D^{0.987} e^{\frac{T}{29.5858} - \frac{H}{28.9855} + \frac{W}{42.735}} \quad (13)$$

283 where  $T$  is the daily maximum temperature,  $H$  the daily minimum relative humidity and  $W$  the daily  
 284 mean wind speed. And  $D$  is the drought factor, given by:

$$285 \quad D = \frac{0.191(I+104)(N+1)^{1.5}}{3.25(N+1)^{1.5} + R - 1} \quad (14)$$

286 where  $N$  is the number of days since the last rain,  $R$  the total rain in the most recent day with rain and  $I$   
 287 the amount of rain needed to restore the soil moisture content to 200 mm in the top 800 mm of soil.

288 Finally, the Nesterov Index (Nesterov, 1949) is the simplest fire index implemented in JULES. It uses  
 289 only the daily mean temperature, mean daily dew point (or suitable substitute), daily total precipitation  
 290 and the previous day's index. The index is incremented daily, unless daily precipitation exceeds 3 mm,  
 291 in which case it is reset:

$$292 \quad N = \begin{cases} N_0 + T(T - D), & P < 3mm \\ 0, & P \geq 3mm \end{cases} \quad (15)$$

293 where  $T$  is the mean daily temperature,  $D$  the mean daily dewpoint,  $P$  the daily total precipitation and  
 294  $N_0$  the previous day's index. The Nesterov index is a key component for other fire models (Venevsky et  
 295 al., 2002; Thonicke et al., 2010).

**Deleted:** Two intermediate quantities, the Initial Spread Index and the build-up index are calculated from these, and are in turn used to yield the final Fire Weather Index. ... [1]

### 296 3 Model configuration

297 Monthly lightning data was obtained from LIS-OTD (Lightning Imaging Sensor-Optical Transient  
 298 Detector) observations for 2013 (Christian et al., 2003) and was recycled for every year in the simulation.  
 299 These detections were converted to cloud-to-ground strikes using the relationship presented in (Prentice  
 300 and Mackerras, 1977). Land use and population density were obtained from the HYDE dataset (Hurt et  
 301 al., 2011) and then linearly interpolated to create inter-annually varying data. Finally annual CO<sub>2</sub>

306 concentrations, which affect vegetation dynamics, were prescribed as a global average following the  
307 dataset prepared for the global carbon budget (Le Quéré et al., 2015).

308 To test the sensitivity to the meteorological input, JULES simulations were driven by meteorology from  
309 both CRU-NCEP (Climate Research Unit and -National Center for Environmental Prediction) v5  
310 (<http://dods.extra.cea.fr/data/p529viov/cruncep/>), and WFDEI (Weedon et al., 2014) with precipitation  
311 from the GPCC (Schneider et al., 2013). Both datasets were used on a 6-hourly basis.

312 Outside of these driving variables, JULES was configured according to the TRENDY project (Sitch et  
313 al., 2015)(Peng et al., 2015)(Peng et al., 2015). 100 year spin-up was performed repeating the 1990-2000  
314 conditions tenfold. Four configurations were used to create simulations covering 1990-2013, although to  
315 validate INFERNO only the 1997-2010 period was analysed. The first three use CRU-NCEP  
316 meteorology with each of our three ignitions modes (see Sect. 2.1.1); constant ignitions (mode 1),  
317 prescribed lightning and constant anthropogenic ignitions (mode 2), and both natural and anthropogenic  
318 ignitions varying with prescribed lightning and population density (mode 3). The fourth simulation  
319 assumes mode 1 (constant ignitions), while meteorology is prescribed from WFDEI and precipitation  
320 from GPCC.

321 Evaluation was performed against the published data for GFEDv3, FINNv1, GFAS and GFEDv4. We  
322 also used the data from GFEDv4s (<http://globalfiredata.org>, manuscript in preparation) and GFEDv4  
323 (Giglio et al., 2013) to calculate grid-specific emissions and burnt-area. The Global Fire Emissions  
324 Database (GFED) passes satellite observation of burnt area through the Carnegie-Ames-Stanford-  
325 Approach (CASA) biogeochemical model in order to obtain emissions from open burning. GFEDv4  
326 (Giglio et al., 2013) innovates on GFEDv3 (Giglio et al., 2010) mainly through an updated algorithm to  
327 retrieve burnt area from MODIS satellite products and an increased spatial and temporal resolution, to  
328 0.25° and daily (this resolution was assessed in Mangeon et al., 2015). Meanwhile GFEDv4s also  
329 includes the contribution from small fires (Randerson et al., 2012). The Fire Inventory from NCAR  
330 version 1.0 (FINNv1, Wiedinmyer et al., 2011) provides high-resolution (both temporal and spatial)  
331 global emissions of trace gas and particle emissions from open burning of biomass. It focuses on rapid  
332 availability and assimilation in real time forecast and follows a similar process to GFED to estimate  
333 emission, but its burnt area is obtained directly from fire pixel using land cover (Wiedinmyer et al.,  
334 2011). The Global Fire Assimilation System (GFAS, Kaiser et al., 2012), unlike the aforementioned  
335 products, directly assess emissions from satellite-observed fire radiative power more apt at detecting  
336 small fires and avoiding the uncertainty of biogeochemical models.

#### 337 4 Results

338 Maps of the burnt area and emitted carbon are displayed in Fig. 2, their resolution is 192 longitudes by  
339 145 latitudes grid-cells (1.875°x1.24°). The results from INFERNO used a configuration with CRUNCEP  
340 meteorology and the third ignition mode: interactive lightning and anthropogenic ignitions. We compare  
341 our results with downscaled means from GFED. INFERNO accurately diagnoses total fire occurrence  
342 and emissions over the 1997-2010 period: we found a spatial correlation of R=0.66 for burnt area and  
343 R=0.59 for emitted carbon, both passing the t-test with 95% significance. In addition, regional mean  
344 yearly budgets are compared with GFED in Table B1. Compared to GFEDv4, we notice INFERNO

Formatted: Superscript

Deleted: Note GFEDv4s' burnt area (<http://globalfiredata.org>, manuscript in preparation) differs from GFEDv4's (Giglio et al., 2013) as it includes small fires (Randerson et al., 2012). Over the total study period,

Deleted: accurate global

Deleted: (with

Deleted: )

352 estimates higher burnt area in all regions apart from Australia and New Zealand, and southern hemisphere  
 353 Africa. Meanwhile emitted carbon is underestimated in boreal regions and equatorial Asia, but  
 354 overestimated in most other regions (significantly in southern hemisphere America). Over the studied  
 355 period, C4 grass were the main contributors to burnt area in INFERNO (a mean 2.34 Mkm<sup>2</sup> per year),  
 356 meanwhile Broadleaf Evergreen Trees (Tropical) led to the most emitted carbon (a mean 1.48 Pg per  
 357 year). GFEDv4 projects the grid-box with maximum burnt area within the Central African Republic  
 358 (87% of grid fraction burnt per year), while INFERNO finds a maximum burnt area of 57%, slightly to  
 359 the North (south-east of lake Tchad). The discrepancy is much larger for emissions, with a maximum  
 360 emitted carbon of 1.47 kg per m<sup>2</sup> in Indonesia predicted by GFEDv4s, against 0.4 kg per m<sup>2</sup> for  
 361 INFERNO, in Angola. These results could be expected, as INFERNO focuses on capturing global  
 362 biomass burning, it will not represent such extremes of burning, furthermore the immense emitted carbon  
 363 observed in Indonesia follows from undiagnosed peat fires, INFERNO's approach to burnt area only  
 364 considers trees, grass and shrub cover and was determined heuristically, meanwhile Hantson et al. (2014)  
 365 found global fire size was mostly influenced by precipitation, aridity and human activity (population  
 366 density and croplands). Further parameterizations for fire size exist (e.g., Hantson et al., 2015, 2016)  
 367 which could improve INFERNO burnt area estimates while maintaining simplicity and traceability.

**Deleted:** We notice burnt area is higher

**Deleted:** other than

**Formatted:** Superscript

**Deleted:** v

**Deleted:** observes

**Deleted:** .

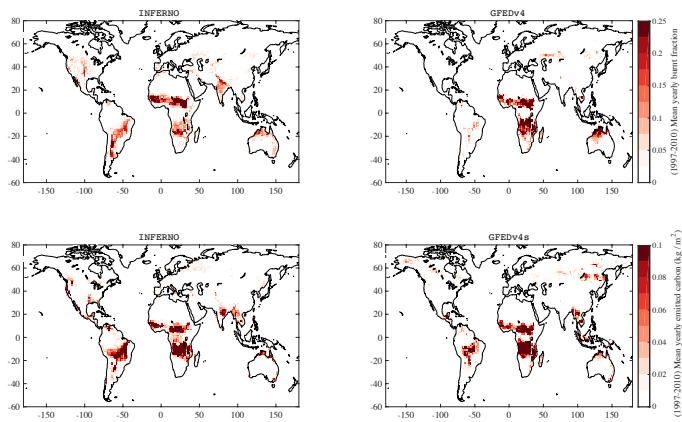

368  
 369 **Fig. 2.** 1997-2010 mean yearly burnt fraction (above) and emitted carbon (below, in kg m<sup>-2</sup>). Shown for  
 370 INFERNO on the left (with CRUNCEP meteorology and interactive ignitions mode 3) and for GFED on the  
 371 right.

**Deleted:** :

372 Figure 3 shows the modelled global annual average biomass burning emissions and burnt area from 1997  
 373 to 2010. The three ignition methods are evaluated: fully interactive ignitions (red) predict the highest  
 374 carbon emissions while interactive lightning with constant human ignitions (blue) the lowest. WFDEI  
 375 was observed to lead to more biomass burning emissions in tropical forest areas (and in particular the  
 376 borders of rainforests), while CRU-NCEP favoured burning in near-desert areas (the Sahel, India and  
 377 south American grasslands). We expect this result to be significantly influenced by differences in  
 378 precipitation (GPCP for WFDEI runs and CRU for CRU-NCEP; Schneider et al., 2013).

**Deleted:** (

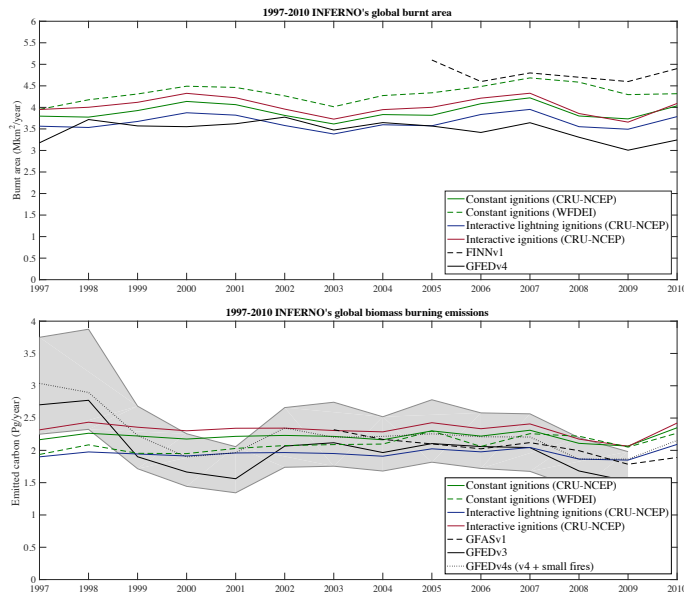

387

388 **Fig. 3. 1997-2010 biomass burning emissions and burnt area predicted by INFERNO. Two driving datasets**  
 389 **were used, CRU-NCEP (solid lines) and WFDEI (green dotted line). Observations are shown in black**  
 390 **(MODIS-based estimates). The grey shading represents one standard deviation within GFEDv3's estimates.**

391 Comparisons to FINNv1, GFEDv4, GFASv1 and GFEDv3 were restricted to their budgets published in  
 392 Kaiser et al. (2012), van der Werf et al. (2010), Wiedinmyer et al. (2011) and Giglio et al. (2013)  
 393 respectively. Meanwhile we calculated global emissions from GFEDv4s (<http://globalfiredata.org>,  
 394 manuscript in preparation).

395 Biomass burning emissions and burnt area simulated by the model follow similar trends to GFEDv3,  
 396 although with a smaller inter-annual variability in the model. Carbon emissions from all simulations fall  
 397 within one standard deviation of GFEDv3, apart from three years: 1997, 1998 and 2001. Note that for  
 398 these years, emissions in GFED were obtained from the lower resolution AVHRR rather than MODIS.  
 399 1997 and 1998 were strong El-Niño years during which droughts in equatorial Asia led to extreme  
 400 emissions from land-clearing fires, a recurrent problem in the region (Field et al., 2009). Indeed in 1997,  
 401 in the region contained between 20S-20N and 90E-160E (or equatorial Asia), GFEDv3 estimate  
 402 emissions of 1.07 PgC, while INFERNO (with CRU-NCEP and fully interactive ignitions) estimates  
 403 0.15 PgC. Unfortunately, peat is not modelled in JULES and thus neither is peat present in our fire  
 404 scheme. It was estimated tropical peat fires alone produced an average of 0.1 PgC per year for 1997-  
 405 2009, and 0.7 PgC in 1997 in particular (van der Werf et al., 2010). Furthermore, 2002 and 2006 also  
 406 saw important peat burning, with GFEDv3 estimating peat emissions of 0.16 and 0.21 PgC respectively.  
 407 In both of these years, the trend in INFERNO differs from GFEDv3's (stagnation in 2002 and decrease  
 408 in 2006). Peat-lands can be significant in equatorial Asia but also boreal regions where their combustion

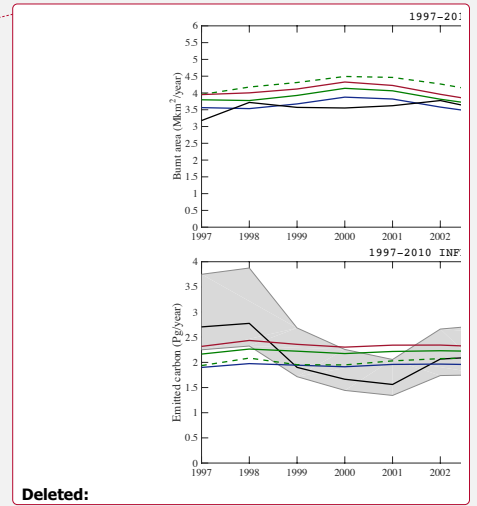

Deleted:

- Deleted: Comparisons
- Deleted: with
- Deleted: ( and
- Deleted: for emissions (the grey shading represents one standard deviation within GFEDv3's estimates), to FINNv1 and GFEDv4 for burnt area,
- Deleted: (
- Deleted: ,
- Deleted: ;
- Deleted: We also calculated global emissions from
- Deleted: , which adds a small fire contribution (Randerson et al., 2012) to GFEDv4's burnt area.

427 leads to the release of long-stored carbon (Turetsky et al., 2015). In 1998 and 2001, the difference in  
 428 emissions could not be attributed to a particular location. While fire emissions from Equatorial Asia were  
 429 underestimated, GFEDv3 observed lower emissions over Africa compared to INFERNO, which seems  
 430 to be the key driver of our discrepancies.

431 **Table 2. Mean yearly emission budgets in Peta-grams of emitted carbon and mean yearly burnt area budgets**  
 432 **in Mkm<sup>2</sup> for the 1997-2010 period. Latitudes were bound to: beyond 50° (high latitudes), 35° to 50° (mid-**  
 433 **latitudes), 15° to 35° (low latitudes) and below 15° (equatorial). Four configurations of INFERNO are**  
 434 **presented, with CRU-NCEP and WFDEI driving meteorology coupled with three ignition modes: mode 1**  
 435 **indicates constant anthropogenic and lightning ignitions, mode 2 is for constant anthropogenic with**  
 436 **interactive lightning ignitions, and mode 3 for interactive lightning and anthropogenic ignitions.**

| <b>Emitted carbon<br/>(PgC/year)</b> | <b>mode 1<br/>CRU-NCEP</b> | <b>mode 1<br/>WFDEI</b> | <b>mode 2<br/>CRU-NCEP</b> | <b>mode 3<br/>CRU-NCEP</b> |
|--------------------------------------|----------------------------|-------------------------|----------------------------|----------------------------|
| <b>High latitudes</b>                | 0.087                      | 0.096                   | 0.082                      | 0.091                      |
| <b>Mid-latitudes</b>                 | 0.185                      | 0.193                   | 0.170                      | 0.191                      |
| <b>Low latitudes</b>                 | 0.716                      | 0.624                   | 0.627                      | 0.591                      |
| <b>Equatorial</b>                    | 1.157                      | 1.130                   | 1.021                      | 1.385                      |

  

| <b>Burnt area<br/>(Mkm<sup>2</sup> / year)</b> | <b>mode 1<br/>CRU-NCEP</b> | <b>mode 1<br/>WFDEI</b> | <b>mode 2<br/>CRU-NCEP</b> | <b>mode 3<br/>CRU-NCEP</b> |
|------------------------------------------------|----------------------------|-------------------------|----------------------------|----------------------------|
| <b>High latitudes</b>                          | 0.176                      | 0.196                   | 0.162                      | 0.179                      |
| <b>Mid-latitudes</b>                           | 0.485                      | 0.557                   | 0.445                      | 0.531                      |
| <b>Low latitudes</b>                           | 1.648                      | 1.884                   | 1.558                      | 1.531                      |
| <b>Equatorial</b>                              | 1.524                      | 1.580                   | 1.423                      | 1.693                      |

437

438

439 Table 2 shows the budgets for four latitudinal bands across the various simulations performed. The  
 440 second ignition mode (constant anthropogenic and interactive lightning ignitions at any time and place)  
 441 appears to consistently predict lower emissions and burnt area (with the exception of low latitudes).  
 442 Furthermore, the main impact of using an ignition model that varies with both natural and anthropogenic  
 443 ignitions is a reduction of fires at low (tropical and sub-tropical) latitudes, and an increase in equatorial  
 444 regions. Indeed, when compared to constant ignitions (mode 1), interactive ignitions (mode 3) predict  
 445 more emissions in forest encroachment regions (noticeably surrounding the Congo and Amazon  
 446 rainforests), and less in heavily-populated areas (Nigeria, India). Meanwhile, we observed interactive  
 447 lightning ignitions (mode 2) significantly reduced burning in grassland-savannah environments. We link  
 448 this to the predominance of cloud-to-ground lightning strikes in wet environment within the LIS-OTD  
 449 dataset (e.g. the Congo rainforest, (Christian et al., 2003) and fewer strikes (and ignitions) in the more  
 450 flammable grasslands and savannahs. These issues are visible in Fig. B1, which shows difference maps  
 451 of the four model configurations, for 1997-2010 mean yearly totals. Equatorial and boreal regions include

452 peat that leads to large fuel consumption, which is unaccounted for in JULES, suggesting that our model  
 453 will inherently underestimate emissions from these regions.

454 Species-specific average emissions produced by the INFERNO scheme are shown in Table 3 in Tg per  
 455 year for the 1997-2010 period. CO and CH<sub>4</sub> appear to be produced in noticeably larger quantities than  
 456 in observation-based emission estimates. This hints at an overrepresentation of smouldering-type  
 457 combustion. In INFERNO this might be due to the emission factors used, or the type of vegetation burnt.

458 Table 3. Average annual emission (Tg per year) for INFERNO with the interactive ignition mode and  
 459 CRUNCEP reanalysis (3 – CRUNCEP) and the constant ignition mode and WFDEI reanalysis (1 – WFDEI),  
 460 comparison to GFASv1 (Kaiser et al., 2012), GFEDv3 (van der Werf et al., 2010) and FINNv1 (Wiedinmver  
 461 et al., 2011) is provided.

| Global emission<br>(Tg/year)  | CO <sub>2</sub> | CO    | CH <sub>4</sub> | NO <sub>x</sub> | BC  | OC   |
|-------------------------------|-----------------|-------|-----------------|-----------------|-----|------|
| <b>INFERNO</b><br>3 – CRUNCEP | 7510.7          | 455.5 | 26.5            | 12.8            | 2.6 | 26.3 |
| 1 – WFDEI                     | 7149.8          | 429.3 | 24.8            | 12.2            | 2.4 | 24.9 |
| GFASv1                        | 6906.7          | 351.5 | 19.0            | 9.5             | 2.0 | 18.2 |
| GFEDv3                        | 6508.3          | 331.1 | 15.7            | 9.4             | 2.0 | 17.6 |
| FINNv1                        | 7322.8          | 372.5 | 18.2            | 12.5            | 2.2 | 23   |

462  
 463 In order to examine whether our flammability can represent fire occurrence, three other fire indices were  
 464 diagnosed, namely the McArthur, Nesterov and Canadian fire indices. These indices were obtained  
 465 seamlessly during the model runs, therefore utilizing the same meteorological and hydrological driving  
 466 variables, and the same vegetation conditions. Their predictions were regressed with GFEDv4 1997-  
 467 2010 annual burnt area (Giglio et al., 2013). This analysis relies on the assumption that fire indices can  
 468 be used as a proxy for the variability of fire occurrence and spread, and eventually of burnt area (not the  
 469 magnitude). Only areas that had been observed to burn sometime between 1997 and 2010 were sampled;  
 470 to avoid accounting for high fire indices in non-vegetated areas such as the Sahara.

471 Table 4 shows the result of our analysis. Ignitions followed mode 1; in this mode ignitions are constant,  
 472 therefore the only variability in burnt area (and performance) is due to INFERNO's flammability scheme.  
 473 The McArthur index performs poorly at high latitudes (it was made for Australia), but outperforms the  
 474 other indices in low latitude regions. The Canadian and Nesterov indices correlate best with observed  
 475 burnt area in high latitude regions (for which they were developed). Altogether, INFERNO's burnt area  
 476 appears to follow observed burnt area better than the sole usage of a fire index.

477 Table 4. Temporal correlation coefficients (R) of annual means (1997-2010) shown for four latitudinal bands.  
 478 R-coefficients were obtained between either of the three simulated fire indices or INFERNO's burnt area  
 479 (ubiquitous ignitions – ignition mode 1, using CRU-NCEP meteorology) and burnt area from GFEDv4 (Giglio  
 480 et al., 2013). Italics mean the correlation was not significant (p-value above 0.05). We restrict our analysis to  
 481 grid-boxes in which GFEDv4 observed burning. Latitudes were bound to: beyond 50° (high latitudes), 35° to  
 482 50° (mid-latitudes), 15° to 35° (low latitudes) and below 15° (equatorial).

| R-coefficient<br>(with GFEDv4 burnt area) | INFERNO<br>Burnt area | Nesterov<br>Index | McArthur<br>Index | Canadian<br>Index |
|-------------------------------------------|-----------------------|-------------------|-------------------|-------------------|
| Global                                    | 0.649                 | 0.088             | <i>-0.009</i>     | 0.266             |

Formatted: Caption, Left, Keep with next

Formatted Table

Formatted: Subscript

Formatted: Subscript

Formatted: Subscript

Formatted: Font:Bold

Formatted: Font:Bold

Deleted: 3

Deleted: 3

Deleted:

Formatted: Font:Italic



|                       |       |               |               |       |
|-----------------------|-------|---------------|---------------|-------|
| <b>High latitudes</b> | 0.476 | 0.522         | <i>-0.005</i> | 0.519 |
| <b>Mid-latitudes</b>  | 0.179 | <i>-0.006</i> | 0.069         | 0.060 |
| <b>Low latitudes</b>  | 0.603 | 0.476         | 0.499         | 0.480 |
| <b>Equatorial</b>     | 0.689 | 0.239         | 0.354         | 0.392 |

Formatted: Font:Italic

Formatted: Font:Italic

486

## 487 5 Conclusion

488 Through a minimalistic approach we propose a parameterization for fire occurrence of appropriate  
489 complexity for application at large spatial scales within an ESM context: the INteractive Fire and  
490 Emission algoRithm for Natural enviroNments (INFERNO). It directly only varies according to  
491 precipitation (and resulting soil moisture), temperature and humidity, and indirectly it utilizes vegetation.  
492 It is also capable of explicitly simulating ignitions using lightning and anthropogenic information. While  
493 our scheme manages to represent fire occurrence on large scales (both spatial and temporal), it performs  
494 best at low latitudes. INFERNO's burnt area scheme appears superior to the use of fire indices alone  
495 (Nesterov, McArthur and basic Canadian) for capturing annual burnt area variations, and thus one form  
496 of fire impact. However, due to the nature of our analysis (fire danger and burnt area remain different  
497 quantities) this does not imply INFERNO should supersede fire weather indices for operational purposes,  
498 neither has our algorithm been built for numerical weather prediction or seasonal fire danger forecasting.  
499 Nonetheless, our current simulations suggest the variability in emissions is underestimated by  
500 INFERNO, in particular the impact of the 1997-1998 El-Niño and the subsequent La Niña, which may  
501 be attributable to the lack of representation of peat in the model, critical to biomass burning in equatorial  
502 Asia and boreal areas. The use of different present-day meteorological datasets has an important impact  
503 on the magnitude and variability of our diagnostics. Using WFDEI-GPCC rather than CRU-NCEP led  
504 to more burnt area but lower fuel consumption and eventually less emitted carbon (this follows from  
505 grasslands burning rather than forests). Vegetation zone interfaces were key to this difference. Similarly,  
506 lightning appears to more frequently ignite fires in wet environments (rainforests) while flammable  
507 environments (savannah, grasslands) with rarer lightning are sensitive to the presence of an  
508 anthropogenic ignition source. Including a scheme to parameterise human impacts appears to  
509 significantly reduce fires in heavily populated areas, while favouring their encroachment of rainforests  
510 (the vicinity of which are an anthropogenic ignition 'sweet spot' in our parameterization). Nevertheless  
511 there is much uncertainty attributed to human induced emissions and effects on fire regime (Marlon et  
512 al., 2008; Thonicke et al., 2010). Accordingly, we include different modes to examine the impact of  
513 ignitions (human or natural) in INFERNO.  
514 The implementation of INFERNO within the Met Office's Unified Model and its significance for  
515 present-day atmospheric composition and climate will be investigated in a separate paper. To close the  
516 vegetation-fire feedback, INFERNO will eventually need to remove carbon from vegetation and to  
517 include tree mortality. While a strength of the model is its minimalistic approach the scheme holds

Deleted: , in particular precipitation,

Deleted: more

Deleted: Accordingly, we include different modes of ignition to dampen the impact of this uncertainty in INFERNO.

522 potential for improvements. ~~For instance~~ litter influences flammability ~~but only~~ live vegetation ~~leads to~~  
 523 ~~emissions while in reality~~ litter ~~significantly contributes to observed fuel consumption (van Leeuwen et~~  
 524 ~~al., 2014)~~. Similarly, we predict that the inclusion of peat within JULES would improve its fire  
 525 diagnostics, especially for locations with large fuel consumptions (e.g. equatorial Asia and boreal  
 526 climates; van der Werf et al., 2010). Given the predictability of emissions from peat fires in relation with  
 527 precipitation (van der Werf et al., 2008), this would be a promising area of exploration. The value of this  
 528 model being its simplicity and linearity, any improvements to INFERNO, ~~should follow this vision~~;  
 529 complex parameterizations are better suited for ~~process-based~~ fire schemes (e.g., Lasslop et al., 2014; Li  
 530 et al., 2013, p.1).

- Deleted:** :
- Deleted:** while
- Deleted:** ,
- Deleted:** is vaporized
- Deleted:** . In reality,
- Deleted:** is observed to burn more than live vegetation
- Deleted:** 's meteorological and hydrological assimilation need to remain minimalistic
- Deleted:** more specialized

531 **Code availability**

532 Information on the JULES land surface model can be found at: <http://jules-lsm.github.io/>. INFERNO is  
 533 included in JULES vn4.5 and is included in this documentation. The JULES source code can be accessed  
 534 via the Met Office's science repository (requires registration): <https://code.metoffice.gov.uk/trac/jules>.  
 535 In particular, the version of the code used to produce the outputs included in this study can be accessed  
 536 at:  
 537 [https://code.metoffice.gov.uk/trac/jules/browser/main/branches/dev/stephanemangeon/vn4.3.1\\_inferno](https://code.metoffice.gov.uk/trac/jules/browser/main/branches/dev/stephanemangeon/vn4.3.1_inferno).

538 **Appendix A**

539 This appendix contains additional information relating to the INFERNO scheme.

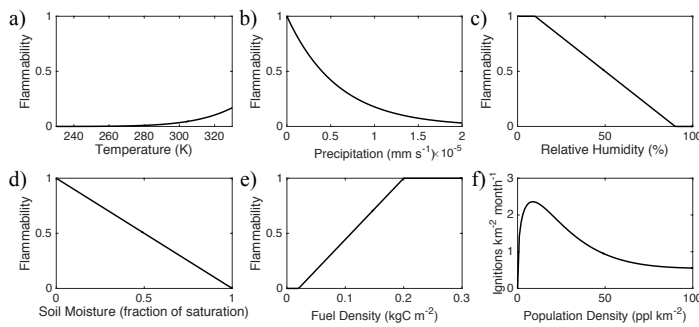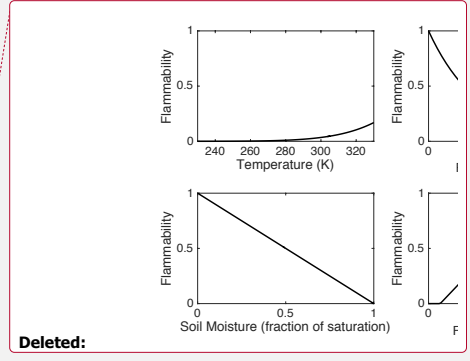

540 **Fig. A1. The mathematical functions used for individual dependencies of INFERNO on key driving variables**  
 541 **for flammability (a,b,c,d,e) and ignitions (f), within the range of reasonable earth observations.** Note the  
 542 **population density only influences the model output if ignition mode 3 is selected (interactive lightning and**  
 543 **human ignition).**

545 **Table A1. The key JULES PFT-specific parameters for allometry and vegetation carbon used in our**  
 546 **simulations (Clark et al., 2011).**

| Specific leaf density<br>$\sigma_l$ (kg C m <sup>-2</sup> ) | Allometric coefficient<br>$\alpha_{wl}$ (kg C m <sup>-2</sup> ) | Allometric exponent<br>$b_{wl}$ | Associated Fire Biome in Akagi et al., 2011 |
|-------------------------------------------------------------|-----------------------------------------------------------------|---------------------------------|---------------------------------------------|
|-------------------------------------------------------------|-----------------------------------------------------------------|---------------------------------|---------------------------------------------|

|                                             |        |       |       |                         |
|---------------------------------------------|--------|-------|-------|-------------------------|
| <b>Broadleaf Evergreen Tree (Tropical)</b>  | 0.0375 | 0.65  | 1.667 | Tropical Forests        |
| <b>Broadleaf Evergreen Tree (Temperate)</b> | 0.0375 | 0.65  | 1.667 | Temperate Forests       |
| <b>Broadleaf Deciduous Tree</b>             | 0.0375 | 0.65  | 1.667 | Tropical Forests        |
| <b>Needleleaf Evergreen Tree</b>            | 0.1    | 0.65  | 1.667 | Temperate Forests       |
| <b>Needleleaf Deciduous Tree</b>            | 0.1    | 0.75  | 1.667 | Boreal Forests          |
| <b>C3 grass</b>                             | 0.025  | 0.005 | 1.667 | Temperate Forests       |
| <b>C4 grass</b>                             | 0.05   | 0.005 | 1.667 | Savannah and Grasslands |
| <b>Evergreen Shrub</b>                      | 0.05   | 0.10  | 1.667 | Temperate Forests       |
| <b>Deciduous Shrub</b>                      | 0.05   | 0.10  | 1.667 | Boreal Forests          |

557

558 **Table A2. The characteristics of the Canadian's Fire Weather Index's three fuel moisture codes.**

|                                | <b>Type of fuel</b>                          | <b>Dry weight (kg m<sup>-2</sup>)</b> | <b>Time lag (days)</b> | <b>Water capacity (mm)</b> |
|--------------------------------|----------------------------------------------|---------------------------------------|------------------------|----------------------------|
| <b>Fine Fuel Moisture Code</b> | Litter and other fine fuels                  | 0.25                                  | 2-3                    | 0.6                        |
| <b>Duff Moisture Code</b>      | Loosely compacted decomposing organic matter | 5                                     | 12                     | 15                         |
| <b>Drought Code</b>            | Deep layer of compact organic matter         | 25                                    | 52                     | 100                        |

559 **Appendix B**

560 This appendix contains additional results illustrating the dependence of INFERNO with ignitions and its  
561 performance on a regional basis.

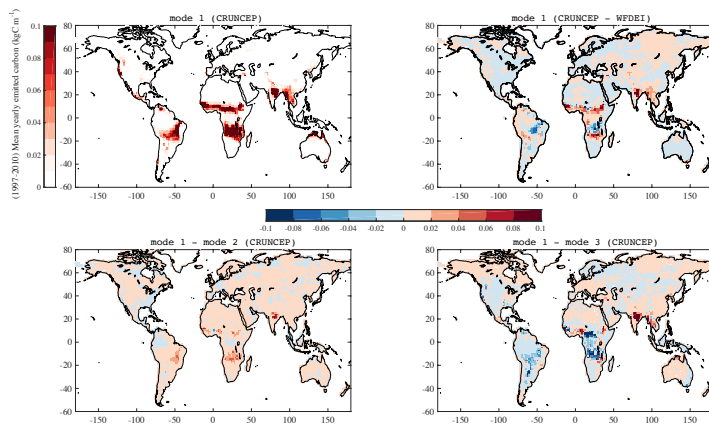

562  
 563 **Fig. B1.** Emitted carbon difference maps between the four runs performed to analyse the sensitivity of  
 564 INFERNO to ignitions (our three ignition modes, see Sect. 2.1.1) and meteorology (CRUNCEP and WFDEI-  
 565 GPCC).

566 **Table B1.** Regional budgets according to the standard GFED regions (van der Werf et al., 2010).

| GFED standard regions                        | Mean Yearly Burnt Area<br>(in Mha) |           | Mean Yearly Emitted Carbon (in<br>TgC) |           |
|----------------------------------------------|------------------------------------|-----------|----------------------------------------|-----------|
|                                              | GFEDv4*                            | INFERNO** | GFED3***                               | INFERNO** |
| <b>Boreal North America</b>                  | 2.2                                | 5.2       | 54                                     | 37        |
| <b>Temperate North America</b>               | 1.8                                | 29.9      | 9                                      | 106       |
| <b>Central America</b>                       | 1.8                                | 7.9       | 20                                     | 45        |
| <b>Northern Hemisphere South<br/>America</b> | 2.6                                | 4.0       | 22                                     | 51        |
| <b>Southern Hemisphere South<br/>America</b> | 18.7                               | 68.3      | 271                                    | 483       |
| <b>Europe</b>                                | 0.7                                | 5.0       | 4                                      | 29        |
| <b>Middle East</b>                           | 0.8                                | 12.3      | 2                                      | 19        |
| <b>Northern Hemisphere Africa</b>            | 117.7                              | 120.4     | 481                                    | 533       |
| <b>Southern Hemisphere Africa</b>            | 125.0                              | 57.6      | 557                                    | 610       |
| <b>Boreal Asia</b>                           | 5.6                                | 9.7       | 128                                    | 55        |
| <b>Central Asia</b>                          | 13.6                               | 23.8      | 36                                     | 50        |
| <b>Southeast Asia</b>                        | 7.0                                | 29.6      | 103                                    | 170       |

|                                  |      |      |     |    |
|----------------------------------|------|------|-----|----|
| <b>Equatorial Asia</b>           | 1.6  | 0.5  | 191 | 10 |
| <b>Australia and New Zealand</b> | 50.2 | 30.2 | 135 | 96 |

567 \* GFEDv4 mean yearly burnt area from Giglio et al. (2013), from 1997 to 2011. \*\* INFERNO mean yearly burnt area from 1997  
568 to 2010, using ignition mode 3 (varying anthropogenic and natural ignitions) and CRU-NCEP driving meteorology. \*\*\* GFED3  
569 mean yearly emitted carbon from van der Werf et al. (2010) from 1997 to 2009.

570 **Author contribution**

571 Apostolos Voulgarakis supervised the scientific design of INFERNO and the writing of this article. Gerd  
572 Folberth also supervised these aspects, with an emphasis on technical aspects of INFERNO in relation  
573 with the Met Office's Unified Model. Richard Gilham contributed to the technical design of the model  
574 and its implementation and led the writing on fire indices. Anna Harper contributed to the design of  
575 INFERNO in relation to the vegetation scheme's recent development, helped with the analysis of  
576 vegetation biases in the study's results and led the writing on the vegetation scheme. Stephen Sitch  
577 contributed throughout the writing, analysis and the scientific design of this study.

578 **Acknowledgements**

579 We wish to thank Robert Field, Pierre Friedlingstein, Stephen Hardwick, Sandy Harrison, Colin Prentice,  
580 Eddie Robertson and Andy Wiltshire for their inputs in the development and design of INFERNO; Olga  
581 Pechony, Greg Faluvegi and Drew Shindell for sharing their work on a fire parameterization. The lead  
582 author gracefully thanks the Natural Environment Research Council (NERC, UK) and the UK Met Office  
583 for ongoing financial support, as well as the European Commission's Marie Curie Actions International  
584 Research Staff Exchange Scheme (IRSES) for past support under the REQUA project.

585 **References**

- 586 Akagi, S. K., Yokelson, R. J., Wiedinmyer, C., Alvarado, M. J., Reid, J. S., Karl, T., Crouse, J. D. and  
587 Wennberg, P. O.: Emission factors for open and domestic biomass burning for use in atmospheric  
588 models, *Atmos Chem Phys*, 11(9), 4039–4072, doi:10.5194/acp-11-4039-2011, 2011.
- 589 Arora, V. K. and Boer, G. J.: Fire as an interactive component of dynamic vegetation models, *J. Geophys.*  
590 *Res. Biogeosciences*, 110(G2), G02008, doi:10.1029/2005JG000042, 2005.
- 591 Best, M. J., Pryor, M., Clark, D. B., Rooney, G. G., Essery, R. . L. H., Ménard, C. B., Edwards, J. M.,  
592 Hendry, M. A., Porson, A., Gedney, N., Mercado, L. M., Sitch, S., Blyth, E., Boucher, O., Cox, P. M.,  
593 Grimmond, C. S. B. and Harding, R. J.: The Joint UK Land Environment Simulator (JULES), model  
594 description – Part 1: Energy and water fluxes, *Geosci. Model Dev.*, 4(3), 677–699, doi:10.5194/gmd-4-  
595 677-2011, 2011.
- 596 Bond, W. J. and Keeley, J. E.: Fire as a global “herbivore”: the ecology and evolution of flammable  
597 ecosystems, *Trends Ecol. Evol.*, 20(7), 387–394, doi:10.1016/j.tree.2005.04.025, 2005.
- 598 Bowman, D. M., Murphy, B. P., Boer, M. M., Bradstock, R. A., Cary, G. J., Cochrane, M. A., Fensham,  
599 R. J., Krawchuk, M. A., Price, O. F. and Williams, R. J.: Forest fire management, climate change, and  
600 the risk of catastrophic carbon losses, *Front. Ecol. Environ.*, 11(2), 66–67, doi:10.1890/13.WB.005,  
601 2013.
- 602 Bowman, D. M. J. S., Balch, J. K., Artaxo, P., Bond, W. J., Carlson, J. M., Cochrane, M. A., D'Antonio,  
603 C. M., DeFries, R. S., Doyle, J. C., Harrison, S. P., Johnston, F. H., Keeley, J. E., Krawchuk, M. A., Kull,  
604 C. A., Marston, J. B., Moritz, M. A., Prentice, I. C., Roos, C. I., Scott, A. C., Swetnam, T. W., Werf, G.  
605 R. van der and Pyne, S. J.: Fire in the Earth System, *Science*, 324(5926), 481–484,  
606 doi:10.1126/science.1163886, 2009.
- 607 Christian, H. J., Blakeslee, R. J., Boccippio, D. J., Boeck, W. L., Buechler, D. E., Driscoll, K. T.,  
608 Goodman, S. J., Hall, J. M., Koshak, W. J., Mach, D. M. and Stewart, M. F.: Global frequency and

609 distribution of lightning as observed from space by the Optical Transient Detector, *J. Geophys. Res.*  
610 *Atmospheres*, 108(D1), 4005, doi:10.1029/2002JD002347, 2003.

611 Chuvieco, E., Giglio, L. and Justice, C.: Global characterization of fire activity: toward defining fire  
612 regimes from Earth observation data, *Glob. Change Biol.*, 14(7), 1488–1502, 2008.

613 Clark, D. B., Mercado, L. M., Sitch, S., Jones, C. D., Gedney, N., Best, M. J., Pryor, M., Rooney, G. G.,  
614 Essery, R. L. H., Blyth, E., Boucher, O., Harding, R. J., Huntingford, C. and Cox, P. M.: The Joint UK  
615 Land Environment Simulator (JULES), model description – Part 2: Carbon fluxes and vegetation  
616 dynamics, *Geosci Model Dev*, 4(3), 701–722, doi:10.5194/gmd-4-701-2011, 2011.

617 Cox, P. M.: Description of the TRIFFID dynamic global vegetation model, Technical Note 24, Hadley  
618 Centre, United Kingdom Meteorological Office, Bracknell, UK. [online] Available from:  
619 [http://www.metoffice.gov.uk/media/pdf/9/h/HCTN\\_24.pdf](http://www.metoffice.gov.uk/media/pdf/9/h/HCTN_24.pdf) (Accessed 10 September 2015), 2001.

620 Field, R. D., van der Werf, G. R. and Shen, S. S. P.: Human amplification of drought-induced biomass  
621 burning in Indonesia since 1960, *Nat. Geosci.*, 2(3), 185–188, doi:10.1038/ngeo443, 2009.

622 Forestry Canada: Development and structure of the Canadian Forest Fire Behavior Prediction System.  
623 [online] Available from: <http://cfs.nrcan.gc.ca/publications?id=10068> (Accessed 8 January 2016), 1992.

624 Fosberg, M. A., Cramer, W., Brovkin, V., Fleming, R., Gardner, R., Gill, A. M., Goldammer, J. G.,  
625 Keane, R., Koehler, P., Lenihan, J., Neilson, R., Sitch, S., Thornicke, K., Venevski, S., Weber, M. G.  
626 and Wittenberg, U.: Strategy for a Fire Module in Dynamic Global Vegetation Models, *Int. J. Wildland*  
627 *Fire*, 9(1), 79–84, 1999.

628 [Giglio, L., Randerson, J. T., van der Werf, G. R., Kasibhatla, P. S., Collatz, G. J., Morton, D. C., and](#)  
629 [DeFries, R. S.: Assessing variability and long-term trends in burned area by merging multiple satellite](#)  
630 [fire products, \*Biogeosciences\*, 7, 1171-1186, doi:10.5194/bg-7-1171-2010, 2010.](#)

631 Giglio, L., Randerson, J. T. and van der Werf, G. R.: Analysis of daily, monthly, and annual burned area  
632 using the fourth-generation global fire emissions database (GFED4), *J. Geophys. Res. Biogeosciences*,  
633 118(1), 317–328, doi:10.1002/jgrg.20042, 2013.

634 Hantson, S., Pueyo, S. and Chuvieco, E.: Global fire size distribution is driven by human impact and  
635 climate, *Glob. Ecol. Biogeogr.*, n/a–n/a, doi:10.1111/geb.12246, 2014.

636 [Hantson, S., Pueyo, S. and Chuvieco, E.: Global fire size distribution: from power law to log-](#)  
637 [normal, \*International Journal of Wildland Fire\* 25, 403–412, doi:10.1071/WF15108, 2016.](#)

638 [Hantson, S., Lasslop, G., Kloster, S. and Chuvieco, E.: Anthropogenic effects on global mean fire](#)  
639 [size, \*International Journal of Wildland Fire\* 24, 589–596, doi:10.1071/WF14208, 2015.](#)

640 [Harper, A., Cox, P., Friedlingstein, P., Wiltshire, A., Jones, C., Sitch, S., Mercado, L. M., Groenendijk,](#)  
641 [M., Robertson, E., Kattge, J., Bönisch, G., Atkin, O. K., Bahn, M., Cornelissen, J., Niinemets, Ü.,](#)  
642 [Onipchenko, V., Peñuelas, J., Poorter, L., Reich, P. B., Soudzilovskaia, N., and van Bodegom, P.:](#)  
643 [Improved representation of plant functional types and physiology in the Joint UK Land Environment](#)  
644 [Simulator \(JULES v4.2\) using plant trait information, \*Geosci. Model Dev. Discuss.\*, doi:10.5194/gmd-](#)  
645 [2016-22, in review, 2016.](#)

646 Huntrieser, H., Schumann, U., Schlager, H., Höller, H., Giez, A., Betz, H.-D., Brunner, D., Forster, C.,  
647 O. Pinto Jr. and Calheiros, R.: Lightning activity in Brazilian thunderstorms during TROCCINOX:  
648 implications for NO<sub>x</sub> production, *Atmos Chem Phys Discuss*, 7(5), 14813–14894, doi:10.5194/acpd-7-  
649 14813-2007, 2007.

650 Hurtt, G. C., Chini, L. P., Frohling, S., Betts, R. A., Feddema, J., Fischer, G., Fisk, J. P., Hibbard, K.,  
651 Houghton, R. A., Janetos, A., Jones, C. D., Kindermann, G., Kinoshita, T., Goldewijk, K. K., Riahi, K.,  
652 Shevliakova, E., Smith, S., Stehfest, E., Thomson, A., Thornton, P., Vuuren, D. P. van and Wang, Y. P.:  
653 Harmonization of land-use scenarios for the period 1500–2100: 600 years of global gridded annual land-

Formatted: Font:Not Italic

Formatted: Font:Not Bold

Formatted: Font:Not Italic

Formatted: Font:Not Bold

654 use transitions, wood harvest, and resulting secondary lands, *Clim. Change*, 109(1-2), 117–161,  
655 doi:10.1007/s10584-011-0153-2, 2011.

656 Johannes Dolman, A. and Gregory, D.: The Parametrization of Rainfall Interception In GCMs, *Q. J. R.  
657 Meteorol. Soc.*, 118(505), 455–467, doi:10.1002/qj.49711850504, 1992.

658 Johnston, F. H., Henderson, S. B., Chen, Y., Randerson, J. T., Marlier, M., DeFries, R. S., Kinney, P.,  
659 Bowman, D. M. J. S. and Brauer, M.: Estimated Global Mortality Attributable to Smoke from Landscape  
660 Fires, *Environ. Health Perspect.*, 120(5), 695–701, doi:10.1289/ehp.1104422, 2012.

661 Kaiser, J. W., Heil, A., Andreae, M. O., Benedetti, A., Chubarova, N., Jones, L., Morcrette, J.-J.,  
662 Razinger, M., Schultz, M. G., Suttie, M. and van der Werf, G. R.: Biomass burning emissions estimated  
663 with a global fire assimilation system based on observed fire radiative power, *Biogeosciences*, 9(1), 527–  
664 554, doi:10.5194/bg-9-527-2012, 2012.

665 Lamarque, J.-F., Bond, T. C., Eyring, V., Granier, C., Heil, A., Klimont, Z., Lee, D., Liousse, C.,  
666 Mieville, A., Owen, B. and others: Historical (1850–2000) gridded anthropogenic and biomass burning  
667 emissions of reactive gases and aerosols: methodology and application, *Atmospheric Chem. Phys.*,  
668 10(15), 7017–7039, 2010.

669 Lamloom, S. H. and Savidge, R. A.: A reassessment of carbon content in wood: variation within and  
670 between 41 North American species, *Biomass Bioenergy*, 25(4), 381–388, doi:10.1016/S0961-  
671 9534(03)00033-3, 2003.

672 Lasslop, G., Thonicke, K. and Kloster, S.: SPITFIRE within the MPI Earth system model: Model  
673 development and evaluation, *J. Adv. Model. Earth Syst.*, n/a–n/a, doi:10.1002/2013MS000284, 2014.

674 Lasslop, G., Hantson, S. and Kloster, S.: Influence of wind speed on the global variability of burned  
675 fraction: a global fire model's perspective, *Int. J. Wildland Fire*, 24(7), 989–1000, 2015.

676 [van Leeuwen, T. T., van der Werf, G. R., Hoffmann, A. A., Detmers, R. G., Rucker, G., French, N. H.](#)  
677 [F., Archibald, S., Carvalho Jr., J. A., Cook, G. D., de Groot, W. J., Hély, C., Kasischke, E. S., Kloster,](#)  
678 [S., McCarty, J. L., Pettinari, M. L., Savadogo, P., Alvarado, E. C., Boschetti, L., Manuri, S., Meyer, C.](#)  
679 [P., Siegert, F., Trollope, L. A., and Trollope, W. S. W.: Biomass burning fuel consumption rates: a field](#)  
680 [measurement database, \*Biogeosciences\*, 11, 7305-7329, doi:10.5194/bg-11-7305-2014, 2014.](#)

681 Le Quéré, C., Moriarty, R., Andrew, R. M., Peters, G. P., Ciais, P., Friedlingstein, P., Jones, S. D., Sitch,  
682 S., Tans, P., Armeth, A., Boden, T. A., Bopp, L., Bozec, Y., Canadell, J. G., Chini, L. P., Chevallier, F.,  
683 Cosca, C. E., Harris, I., Hoppema, M., Houghton, R. A., House, J. I., Jain, A. K., Johannessen, T., Kato,  
684 E., Keeling, R. F., Kitidis, V., Klein Goldewijk, K., Koven, C., Landa, C. S., Landschützer, P., Lenton,  
685 A., Lima, I. D., Marland, G., Mathis, J. T., Metz, N., Nojiri, Y., Olsen, A., Ono, T., Peng, S., Peters, W.,  
686 Pfeil, B., Poulter, B., Raupach, M. R., Regnier, P., Rödenbeck, C., Saito, S., Salisbury, J. E., Schuster,  
687 U., Schwinger, J., Séférian, R., Segsneider, J., Steinhoff, T., Stocker, B. D., Sutton, A. J., Takahashi,  
688 T., Tilbrook, B., van der Werf, G. R., Viovy, N., Wang, Y.-P., Wanninkhof, R., Wiltshire, A. and Zeng,  
689 N.: Global carbon budget 2014, *Earth Syst. Sci. Data*, 7(1), 47–85, doi:10.5194/essd-7-47-2015, 2015.

690 Li, F., Zeng, X. D. and Levis, S.: A process-based fire parameterization of intermediate complexity in a  
691 Dynamic Global Vegetation Model, *Biogeosciences*, 9(7), 2761–2780, doi:10.5194/bg-9-2761-2012,  
692 2012.

693 Li, F., Levis, S. and Ward, D. S.: Quantifying the role of fire in the Earth system – Part 1: Improved  
694 global fire modeling in the Community Earth System Model (CESM1), *Biogeosciences*, 10(4), 2293–  
695 2314, doi:10.5194/bg-10-2293-2013, 2013.

696 Li, F., Bond-Lamberty, B. and Levis, S.: Quantifying the role of fire in the Earth system – Part 2: Impact  
697 on the net carbon balance of global terrestrial ecosystems for the 20th century, *Biogeosciences*, 11(5),  
698 1345–1360, doi:10.5194/bg-11-1345-2014, 2014.



- 699 [Mangeon, S., R.D. Field, M. Fromm, C. McHugh, and A. Voulgarakis, 2015: Satellite versus ground-](#)  
700 [based estimates of burned area: A comparison between MODIS based burned area and fire agency reports](#)  
701 [over North America in 2007. \*Anthropocene Rev.\*, early on-line, doi:10.1177/2053019615588790.](#)
- 702 Marlier, M. E., DeFries, R. S., Voulgarakis, A., Kinney, P. L., Randerson, J. T., Shindell, D. T., Chen,  
703 Y. and Faluvegi, G.: El Nino and health risks from landscape fire emissions in southeast Asia, *Nat. Clim.*  
704 *Change*, 3(2), 131–136, doi:10.1038/nclimate1658, 2013.
- 705 Marlon, J. R., Bartlein, P. J., Carcaillet, C., Gavin, D. G., Harrison, S. P., Higuera, P. E., Joos, F., Power,  
706 M. J. and Prentice, I. C.: Climate and human influences on global biomass burning over the past  
707 two millennia, *Nat. Geosci.*, 1(10), 697–702, doi:10.1038/ngeo313, 2008.
- 708 Nesterov, V.: Forest fires and methods of fire risk determination, *Russ. Goslesbumizdat Mosc.*, 1949.
- 709 Noble, I. R., Gill, A. M. and Bary, G. a. V.: McArthur's fire-danger meters expressed as equations, *Aust.*  
710 *J. Ecol.*, 5(2), 201–203, doi:10.1111/j.1442-9993.1980.tb01243.x, 1980.
- 711 Pechony, O. and Shindell, D. T.: Fire parameterization on a global scale, *J. Geophys. Res. Atmospheres*,  
712 114(D16), D16115, doi:10.1029/2009JD011927, 2009.
- 713 Pechony, O. and Shindell, D. T.: Driving forces of global wildfires over the past millennium and the  
714 forthcoming century, *Proc. Natl. Acad. Sci.*, doi:10.1073/pnas.1003669107, 2010.
- 715 Peng, S., Ciais, P., Chevallier, F., Peylin, P., Cadule, P., Sitch, S., Piao, S., Ahlström, A., Huntingford,  
716 C., Levy, P., Li, X., Liu, Y., Lomas, M., Poulter, B., Viovy, N., Wang, T., Wang, X., Zaehle, S., Zeng,  
717 N., Zhao, F. and Zhao, H.: Benchmarking the seasonal cycle of CO<sub>2</sub> fluxes simulated by terrestrial  
718 ecosystem models, *Glob. Biogeochem. Cycles*, 29(1), 2014GB004931, doi:10.1002/2014GB004931,  
719 2015.
- 720 Pfeiffer, M., Spessa, A. and Kaplan, J. O.: A model for global biomass burning in preindustrial time:  
721 LPJ-LMfire (v1.0), *Geosci Model Dev*, 6(3), 643–685, doi:10.5194/gmd-6-643-2013, 2013.
- 722 Prentice, S. A. and Mackerras, D.: The Ratio of Cloud to Cloud-Ground Lightning Flashes in  
723 Thunderstorms, *J. Appl. Meteorol.*, 16(5), 545–550, doi:10.1175/1520-  
724 0450(1977)016<0545:TROCTC>2.0.CO;2, 1977.
- 725 Randerson, J. T., Chen, Y., van der Werf, G. R., Rogers, B. M. and Morton, D. C.: Global burned area  
726 and biomass burning emissions from small fires, *J. Geophys. Res. Biogeosciences*, 117(G4), G04012,  
727 doi:10.1029/2012JG002128, 2012.
- 728 Schneider, U., Becker, A., Finger, P., Meyer-Christoffer, A., Ziese, M. and Rudolf, B.: GPCP's new land  
729 surface precipitation climatology based on quality-controlled in situ data and its role in quantifying the  
730 global water cycle, *Theor. Appl. Climatol.*, 115(1-2), 15–40, doi:10.1007/s00704-013-0860-x, 2013.
- 731 Sirakoff, C.: A correction to the equations describing the McArthur forest fire danger meter, *Aust. J.*  
732 *Ecol.*, 10(4), 481–481, doi:10.1111/j.1442-9993.1985.tb00909.x, 1985.
- 733 Sitch, S., Smith, B., Prentice, I. C., Arneth, A., Bondeau, A., Cramer, W., Kaplan, J. O., Levis, S., Lucht,  
734 W., Sykes, M. T., Thonicke, K. and Venevsky, S.: Evaluation of ecosystem dynamics, plant geography  
735 and terrestrial carbon cycling in the LPJ dynamic global vegetation model, *Glob. Change Biol.*, 9(2),  
736 161–185, doi:10.1046/j.1365-2486.2003.00569.x, 2003.
- 737 Sitch, S., Friedlingstein, P., Gruber, N., Jones, S. D., Murray-Tortarolo, G., Ahlström, A., Doney, S. C.,  
738 Graven, H., Heinze, C., Huntingford, C., Levis, S., Levy, P. E., Lomas, M., Poulter, B., Viovy, N.,  
739 Zaehle, S., Zeng, N., Arneth, A., Bonan, G., Bopp, L., Canadell, J. G., Chevallier, F., Ciais, P., Ellis, R.,  
740 Gloor, M., Peylin, P., Piao, S. L., Le Quéré, C., Smith, B., Zhu, Z. and Myneni, R.: Recent trends and  
741 drivers of regional sources and sinks of carbon dioxide, *Biogeosciences*, 12(3), 653–679, doi:10.5194/bg-  
742 12-653-2015, 2015.

- 743 Spracklen, D. V., Logan, J. A., Mickley, L. J., Park, R. J., Yevich, R., Westerling, A. L. and Jaffe, D. A.:  
 744 Wildfires drive interannual variability of organic carbon aerosol in the western U.S. in summer, *Geophys.*  
 745 *Res. Lett.*, 34(16), L16816, doi:10.1029/2007GL030037, 2007.
- 746 Thonicke, K., Venevsky, S., Sitch, S. and Cramer, W.: The role of fire disturbance for global vegetation  
 747 dynamics: coupling fire into a Dynamic Global Vegetation Model, *Glob. Ecol. Biogeogr.*, 10(6), 661–  
 748 677, doi:10.1046/j.1466-822X.2001.00175.x, 2001.
- 749 Thonicke, K., Spessa, A., Prentice, I. C., Harrison, S. P., Dong, L. and Carmona-Moreno, C.: The  
 750 influence of vegetation, fire spread and fire behaviour on biomass burning and trace gas emissions:  
 751 results from a process-based model, *Biogeosciences*, 7(6), 1991–2011, doi:10.5194/bg-7-1991-2010,  
 752 2010.
- 753 Tosca, M. G., Randerson, J. T. and Zender, C. S.: Global impact of smoke aerosols from landscape fires  
 754 on climate and the Hadley circulation, *Atmos Chem Phys*, 13(10), 5227–5241, doi:10.5194/acp-13-5227-  
 755 2013, 2013.
- 756 Turetsky, M. R., Benscotter, B., Page, S., Rein, G., van der Werf, G. R. and Watts, A.: Global  
 757 vulnerability of peatlands to fire and carbon loss, *Nat. Geosci.*, 8(1), 11–14, doi:10.1038/ngeo2325, 2015.
- 758 Van Wagner, C. E. and Pickett, T. L.: Equations and FORTRAN program for the Canadian Forest Fire  
 759 Weather Index System. [online] Available from: <http://www.cfs.nrcan.gc.ca/publications/?id=19973>  
 760 (Accessed 8 January 2016), 1985.
- 761 Venevsky, S., Thonicke, K., Sitch, S. and Cramer, W.: Simulating fire regimes in human-dominated  
 762 ecosystems: Iberian Peninsula case study, *Glob. Change Biol.*, 8(10), 984–998, doi:10.1046/j.1365-  
 763 2486.2002.00528.x, 2002.
- 764 Voulgarakis, A. and Field, R. D.: Fire Influences on Atmospheric Composition, Air Quality and Climate,  
 765 *Curr. Pollut. Rep.*, 1(2), 70–81, doi:10.1007/s40726-015-0007-z, 2015.
- 766 Voulgarakis, A., Savage, N. H., Wild, O., Braesicke, P., Young, P. J., Carver, G. D. and Pyle, J. A.:  
 767 Interannual variability of tropospheric composition: the influence of changes in emissions, meteorology  
 768 and clouds, *Atmos Chem Phys*, 10(5), 2491–2506, doi:10.5194/acp-10-2491-2010, 2010.
- 769 Voulgarakis, A., Marlier, M. E., Faluvegi, G., Shindell, D. T., Tsigaridis, K. and Mangeon, S.:  
 770 Interannual variability of tropospheric trace gases and aerosols: The role of biomass burning emissions,  
 771 *J. Geophys. Res. Atmospheres*, 120(14), 7157–7173, doi:10.1002/2014JD022926, 2015.
- 772 Weedon, G. P., Balsamo, G., Bellouin, N., Gomes, S., Best, M. J. and Viterbo, P.: The WFDEI  
 773 meteorological forcing data set: WATCH Forcing Data methodology applied to ERA-Interim reanalysis  
 774 data, *Water Resour. Res.*, 50(9), 7505–7514, doi:10.1002/2014WR015638, 2014.
- 775 van der Werf, G. R., Morton, D. C., DeFries, R. S., Olivier, J. G. J., Kasibhatla, P. S., Jackson, R. B.,  
 776 Collatz, G. J. and Randerson, J. T.: CO<sub>2</sub> emissions from forest loss, *Nat. Geosci.*, 2(11), 737–738,  
 777 doi:10.1038/ngeo671, 2009.
- 778 van der Werf, G. R., Randerson, J. T., Giglio, L., Collatz, G. J., Mu, M., Kasibhatla, P. S., Morton, D.  
 779 C., DeFries, R. S., Jin, Y. and van Leeuwen, T. T.: Global fire emissions and the contribution of  
 780 deforestation, savanna, forest, agricultural, and peat fires (1997–2009), *Atmos Chem Phys*, 10(23),  
 781 11707–11735, doi:10.5194/acp-10-11707-2010, 2010.
- 782 van der Werf, G., Dempewolf, J., Trigg, S. N., Randerson, J. T., Kasibhatla, P. S., Giglio, L., Murdiyarso,  
 783 D., Peters, W., Morton, D. C., Collatz, G. J., Dolman, A. J. and DeFries, R. S.: Climate regulation of fire  
 784 emissions and deforestation in equatorial Asia, *Proc. Natl. Acad. Sci.*, 105(51), 20350–20355,  
 785 doi:10.1073/pnas.0803375105, 2008.
- 786 Wiedinmyer, C., Akagi, S. K., Yokelson, R. J., Emmons, L. K., Al-Saadi, J. A., Orlando, J. J. and Soja,  
 787 A. J.: The Fire INventory from NCAR (FINN): a high resolution global model to estimate the emissions  
 788 from open burning, *Geosci. Model Dev.*, 4(3), 625–641, doi:10.5194/gmd-4-625-2011, 2011.

789 Yue, C., Ciais, P., Cadule, P., Thonicke, K., Archibald, S., Poulter, B., Hao, W. M., Hantson, S.,  
790 Mouillot, F., Friedlingstein, P., Maignan, F. and Viovy, N.: Modelling the role of fires in the terrestrial  
791 carbon balance by incorporating SPITFIRE into the global vegetation model ORCHIDEE – Part 1:  
792 simulating historical global burned area and fire regimes, *Geosci Model Dev*, 7(6), 2747–2767,  
793 doi:10.5194/gmd-7-2747-2014, 2014.

794

Two intermediate quantities, the Initial Spread Index and the build-up index are calculated from these, and are in turn used to yield the final Fire Weather Index.

The McArthur Forest Fire Danger Index (Noble et al., 1980; Sirakoff, 1985) was developed for use in Australia. Simpler in its formulation than the Canadian index, it consists of a drought component modified by the local temperature, humidity and wind speed. The calculation of the drought component depends on the soil moisture deficit (the amount of water needed to restore the soil moisture content of the top 800 mm of soil to 200 mm), which is related to the JULES soil moisture.

Finally, the Nesterov Index (Nesterov, 1949) is the simplest fire index implemented in JULES. It uses only the daily mean temperature, mean daily dew point (or suitable substitute), daily total precipitation and the previous day's index. The index is incremented daily, unless daily precipitation exceeds 3 mm, in which case it is reset. The Nesterov index is a key component for other fire models (Venevsky et al., 2002; Thonicke et al., 2010).
